# Expression and prognosis analysis of *DNMT* family in acute myeloid leukemia

Ting-Juan Zhang<sup>1,2,3,\*</sup>, Liu-Chao Zhang<sup>4,\*</sup>, Zi-Jun Xu<sup>2,3,5</sup>, Jing-Dong Zhou<sup>1,2,3</sup>

<sup>1</sup>Department of Hematology, Affiliated People's Hospital of Jiangsu University, Zhenjiang, Jiangsu, People's Republic of China

<sup>2</sup>Zhenjiang Clinical Research Center of Hematology, Zhenjiang, Jiangsu, People's Republic of China

<sup>3</sup>The Key Lab of Precision Diagnosis and Treatment in Hematologic Malignancies of Zhenjiang, Zhenjiang, Jiangsu, People's Republic of China

<sup>4</sup>Department of Medical Laboratory, Shanghai Deji Hospital, Qingdao University, Shanghai, People's Republic of China

<sup>5</sup>Laboratory Center, Affiliated People's Hospital of Jiangsu University, Zhenjiang, Jiangsu, People's Republic of China

\*Equal contribution

**Correspondence to:** Jing-Dong Zhou, Zi-Jun Xu; **email:** [zhoujingdong1989@qq.com](mailto:zhoujingdong1989@qq.com), [972416919@qq.com](mailto:972416919@qq.com)

**Keywords:** DNMTs, expression, prognosis, HSCT, AML

**Received:** March 24, 2020

**Accepted:** June 4, 2020

**Published:** June 26, 2020

**Copyright:** Zhang et al. This is an open-access article distributed under the terms of the Creative Commons Attribution License (CC BY 3.0), which permits unrestricted use, distribution, and reproduction in any medium, provided the original author and source are credited.

## ABSTRACT

DNA methyltransferases (*DNMTs*) by regulating DNA methylation play crucial roles in the progression of hematologic malignancies, especially for acute myeloid leukemia (AML). Accumulating investigations have identified the high incidence of *DNMT3A* mutation in AML, and it is correlated with poor prognosis. Although a few studies have shown the expression of *DNMTs* and their clinical significance in AML, the results remain to be discussed. Herein, we systemically analyzed the *DNMTs* expression and their relationship with clinic-pathological features and prognosis in AML patients. *DNMTs* expression especially for *DNMT3A/3B* was closely associated with AML among various human cancers. *DNMT3A* expression was increased in AML patients, whereas *DNMT3B* expression was decreased. Significant associations between *DNMT3A/B* expression and clinic-pathological features/gene mutations were observed. Kaplan-Meier analysis showed that *DNMT3A* expression was associated with better overall survival (OS) and leukemia-free survival (LFS) among whole-cohort AML, and independently affected OS determined by Cox regression multivariate analysis. Notably, patients that received hematopoietic stem cell transplantation (HSCT) showed significantly better OS and LFS in *DNMT3A* lower-expressed groups, whereas patients in *DNMT3A* higher-expressed groups did not. By bioinformatics analysis, *DNMT3A* expression was found to be positively correlated with several leukemia-associated genes/microRNAs, and *DNMT3A* was identified as direct targets of *miR-429* and *miR-29b* in AML. Collectively, our study demonstrated that *DNMT3A/3B* showed significant expression differences in AML. *DNMT3A* expression acted as a potential prognostic biomarker and may guide treatment choice between chemotherapy and HSCT in AML.

## INTRODUCTION

DNA methylation, as the most common epigenetic modification, plays a crucial role in tissue- and stage-specific gene regulation, genomic imprinting, and X-

chromosome inactivation, and has shown to be essential for normal mammalian development [1]. Also, accumulating studies have proved that both global DNA hypomethylation and hypermethylation occur frequently in tumorigenesis [2]. The hypermethylation of CpG

islands at the promoter regions is often associated with the inactivation of tumor suppressor genes (TSGs) [3]. In hematopoietic disorders, aberrant DNA hypermethylation is proved to be involved in leukemogenesis [4]. For example, Spencer et al demonstrated that CpG island hypermethylation mediated by *DNMT3A* was a consequence of acute myeloid leukemia (AML) progression [5]. In addition, aberrant DNA methylation was also regarded as a dominant mechanism in progression from myelodysplastic syndromes (MDS) to AML [6]. Furthermore, deregulated DNA methylation in MDS and AML has led to the approval for the clinical use of hypomethylating agents (HMAs) in both MDS and AML patients [7].

DNA methyltransferases (*DNMTs*) are the main key effectors of DNA methylation by catalyzing the transfer of methyl groups from S-adenosyl-methionine to the 5'-position of cytosine residing in the dinucleotide sequence cytosine-guanine [8]. The *DNMTs* include three major members (*DNMT1*, *DNMT3A* and *DNMT3B*), among which *DNMT3A* and *DNMT3B* catalyze cytosine methylation of mammalian genomic DNA to establish *de novo* DNA methylation patterns, whereas *DNMT1* maintains a methylation state through DNA replication [9]. Recent studies have demonstrated that *DNMTs* play vital roles in the progression of hematologic malignancies, especially AML [10]. Trowbridge et al showed that haploinsufficiency of *DNMT1* impaired leukemia stem cell (LSC) function through derepression of bivalent chromatin domains [11]. More importantly, high incidence of *DNMT3A* mutation was identified in AML and *DNMT3A* mutation correlated with poor prognosis in AML [12]. Functional studies showed that *DNMT3A* was essential for hematopoietic stem cell (HSC) differentiation and mutated *DNMT3A* initiated AML [13–14], suggesting *DNMT3A* acted as a tumor suppressor gene. Although *DNMT3B* was rarely mutated in AML [15], studies have proved that loss of *DNMT3B* accelerated MLL-AF9 leukemia progression and increased expression of *DNMT3B* in LSC delayed leukemogenesis [16–17]. A few studies have shown the expression of *DNMTs* and their clinical significance in AML, but the results remain to be discussed [18–21]. Herein, we systemically analyzed *DNMTs* expression and their relationship with clinic-pathological features and prognosis in patients with AML.

## RESULTS

### DNMTs expression associated with AML among human cancer cell lines

Using the Cancer Cell Line Encyclopedia (CCLE) databases, we found that expression of *DNMTs* was

highly expressed in AML cell lines among 40 types of human cancer cell lines (Figure 1A). Moreover, *DNMTs* expression was also closely associated with myeloid cell lines revealed by The Human Protein Atlas (HPA) databases (Figure 1B). The detailed comparison of *DNMTs* expression in 14 types of AML cell lines was assessed by using the European Bioinformatics Institute (EMBL-EBI) website, which was shown in Figure 1C.

### DNMTs expression associated with AML patients among human cancers

We further determined expression of *DNMTs* in AML patients by using Gene Expression Profiling Interactive Analysis (GEPIA) dataset. Aberrant expression of *DNMT3A* and *DNMT3B* was observed in AML among 33 types of human cancers, whereas *DNMT1* did not show significant difference in AML (Figure 2A). *DNMT3A* expression was significantly increased in AML patients, whereas *DNMT3B* expression was markedly decreased in AML patients (Figure 2B). Moreover, *DNMT1* expression was slightly associated with both *DNMT3A* and *DNMT3B* expression, whereas *DNMT3A* expression was positively correlated with *DNMT3B* expression in AML patients (Figure 2C).

### Association between DNMT3A/3B expression and clinical characteristics in AML

Since aberrant expression of *DNMT3A* and *DNMT3B* was identified in AML, we further explore their clinical significance in patients with AML. Clinical implication of *DNMT3A* and *DNMT3B* was obtained by the comparison of clinical/laboratory characteristics of the AML patients between two groups divided based on median level of *DNMT3A* and *DNMT3B* transcript (Table 1). Interestingly, *DNMT3A* overexpression was associated younger age and lower white blood cells (WBCs) ( $P=0.008$  and  $0.063$ , respectively), higher peripheral blood (PB) blasts ( $P=0.006$ ). Among the distribution of French-American-British (FAB) and cytogenetic subtypes, *DNMT3A* overexpression was associated with higher frequency of FAB-M0/M2, t(8;21), and -7/del(7) ( $P=0.009$ ,  $0.028$ ,  $0.007$ , and  $0.007$ , respectively), whereas lower frequency of FAB-M4/M5 and normal karyotype ( $P=0.004$ ,  $0.001$ , and  $0.000$ , respectively). In addition, *DNMT3B* underexpression was correlated with higher WBCs and lower PB blasts ( $P=0.041$  and  $0.006$ , respectively). Among the distribution of FAB and cytogenetic subtypes, *DNMT3B* underexpression was associated with higher frequency of FAB-M4/M5 and inv(16) ( $P=0.000$ ,  $0.000$ , and  $0.001$ , respectively), but lower frequency of FAB-M1 and complex karyotype ( $P=0.000$  and  $0.000$ , respectively).

## Correlation between DNMT3A/3B expression and gene mutations in AML

Among the common gene mutations in AML, patients with *DNMT3A* overexpression showed lower *NPM1* and *DNMT3A* mutation rates ( $P=0.000$  and  $0.002$ , respectively), whereas cases with *DNMT3B* underexpression presented lower frequency of *IDH1* and *TP53* mutation ( $P=0.038$  and  $0.005$ , respectively). In addition, we further compared the expression of *DNMT3A* and *DNMT3B* in mutation and wild-type groups of these genes (Figure 3).

## Prognostic value of DNMTs expression in AML

We next evaluate the prognostic effect of *DNMTs* expression on survival in AML. By Kaplan-Meier analysis, only *DNMT3A* overexpression was associated

with longer overall survival (OS) and leukemia-free survival (LFS) in whole-cohort AML ( $P=0.001$  and  $0.003$ , respectively, Figure 4). In order to confirm the independent prognostic value of *DNMT3A* expression on both OS and LFS, we performed Cox regression analysis adjusting for prognosis-related factors. By Cox regression multivariate analysis, *DNMT3A* expression could act as an independent prognostic biomarker for OS in whole-cohort AML (Table 2). However, no significant differences were observed in either *DNMT1* or *DNMT3B* groups (Figure 4).

## DNMT3A expression may guide treatment choice between chemotherapy and HSCT

Because lower *DNMT3A* expression predicted poor clinical outcome in AML, we intended to investigate whether patients with lower *DNMT3A* expression could

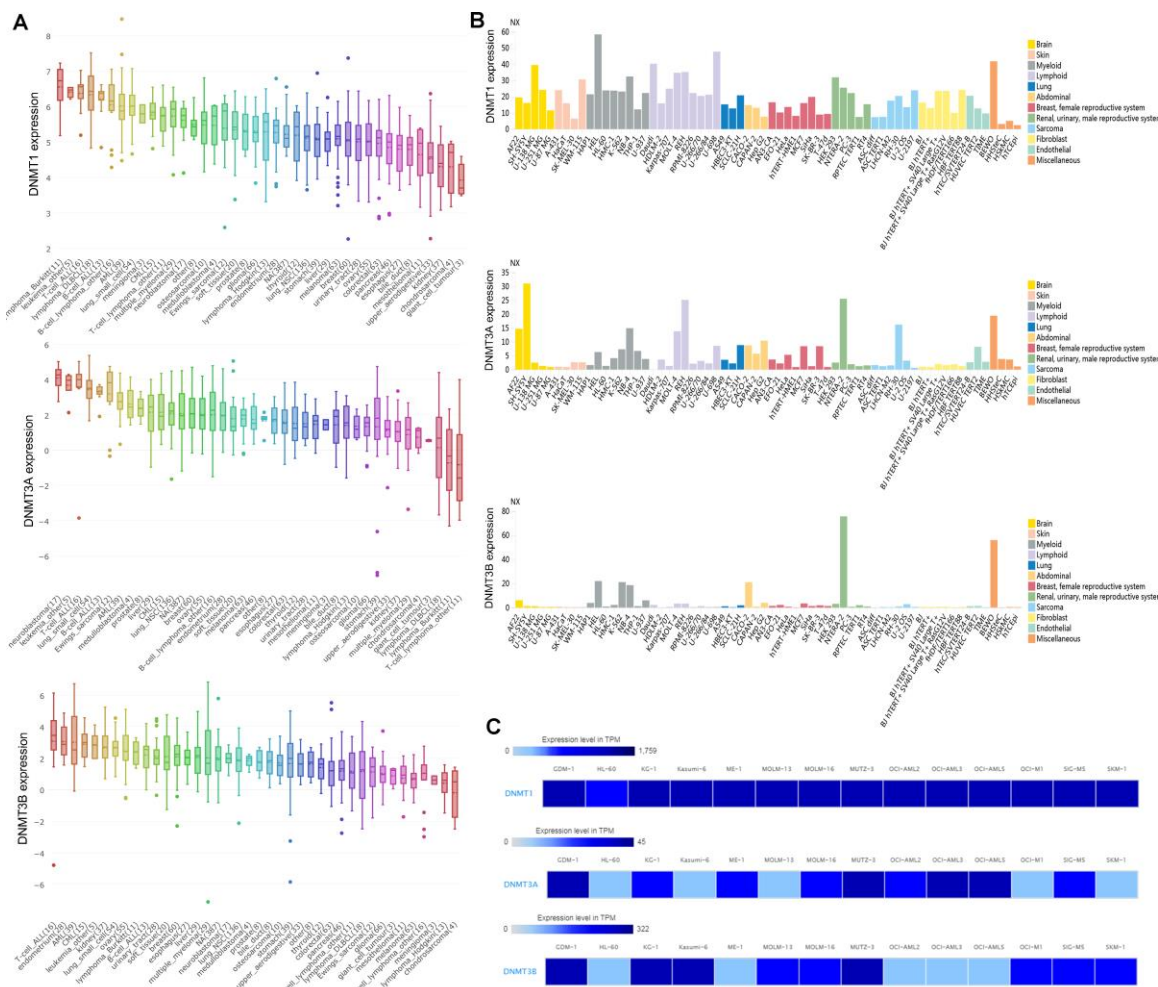

**Figure 1. The expression of DNMTs in human cancer cell lines including AML cell lines. (A)** The expression of DNMTs in leukemia cell lines, analyzing by Cancer Cell Line Encyclopedia (CCLE) dataset. **(B)** The expression of DNMTs in leukemia cell lines, analyzing by The Human Protein Atlas (HPA) dataset. **(C)** The expression of DNMTs in leukemia cell lines, analyzed by European Bioinformatics Institute (EMBL-EBI) dataset.

benefit from HSCT. We compared OS and LFS between patients with and without HSCT in both lower and higher *DNMT3A* expression groups. In lower *DNMT3A* expression groups, patients who received HSCT showed significantly longer OS and LFS than patients who were not treated with HSCT among both total AML (Figure 5). However, in higher *DNMT3A* expression groups, there were no significant differences in OS and LFS between two groups (Figure 5). Taken together, AML patients with lower *DNMT3A* expression could benefit from HSCT, whereas those with higher *DNMT3A* expression did not. Therefore, we deduced that *DNMT3A* expression pattern may guide treatment choice between chemotherapy and HSCT.

### Molecular signature correlated with DNMT3A expression in AML

To gain insights into the biological function of *DNMT3A* in AML, we first compared the transcriptomes of lower and higher *DNMT3A* expression groups. A total of 972 differentially expressed genes (DEGs) were identified including 428 positively correlated genes and 544 negatively correlated genes (FDR<0.05,  $P<0.05$ ,  $|\log_2 FC|>1.5$ ; Figure 6A; Supplementary Table 1). Positively correlated genes such as *MNI*, *BAALC*, *CD34*, and *H19* have been reported as proto-oncogenes in AML [22–24]. Furthermore, the Gene Ontology (GO) analysis was also showed in Figure 6B.

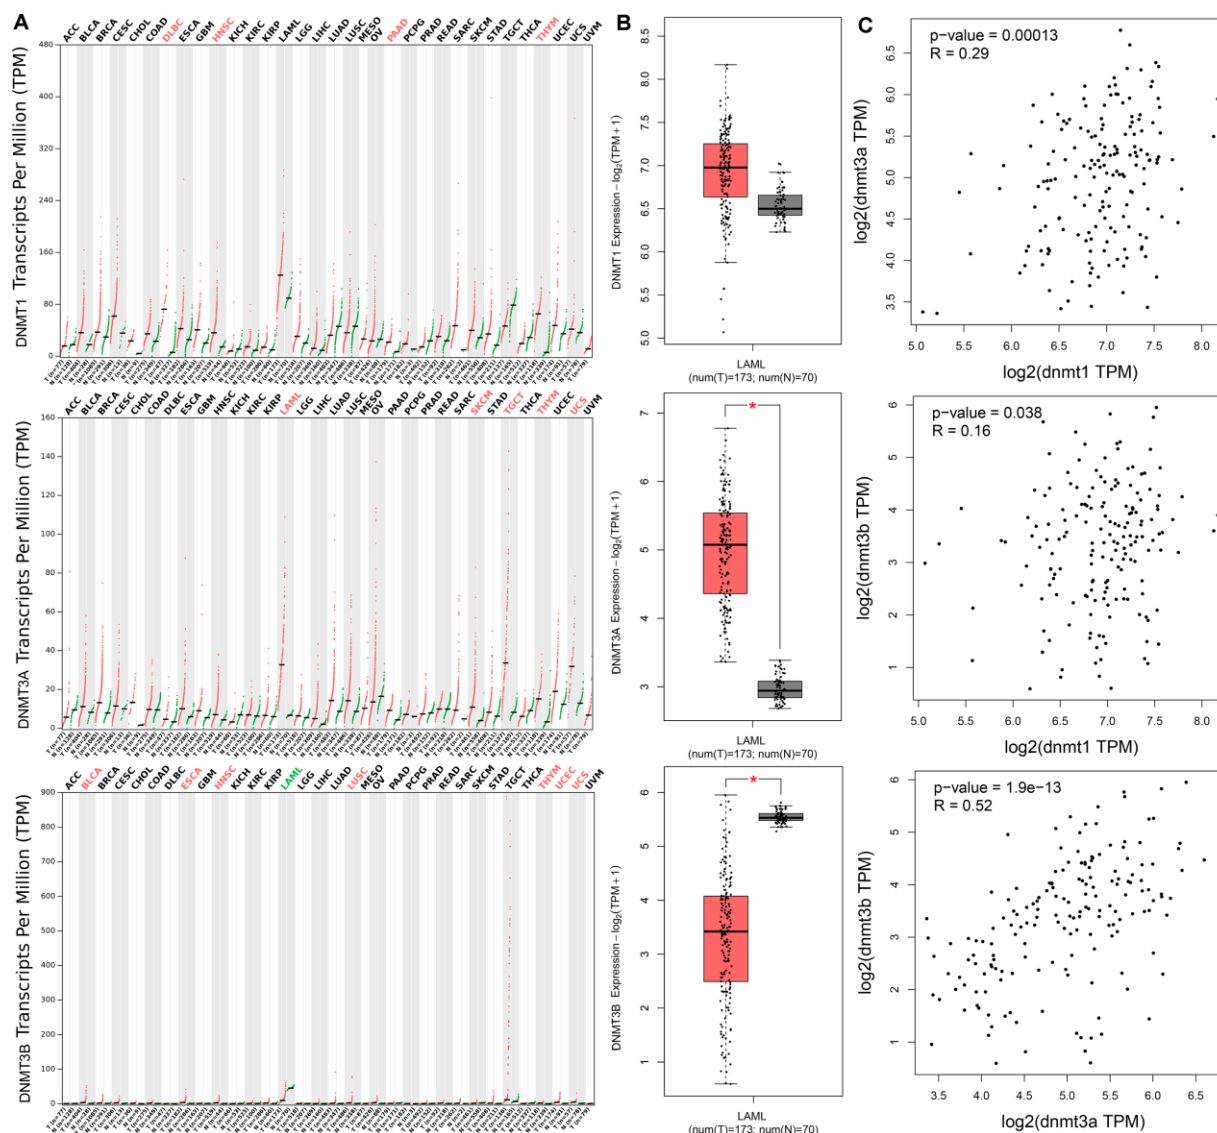

**Figure 2. The expression of DNMTs in human cancers including AML patients.** (A) The expression of *DNMTs* in pan-cancer analyzed by Gene Expression Profiling Interactive Analysis (GEPIA) web (<http://gepia.cancer-pku.cn/>). (B) The expression of *DNMTs* in AML analyzed by Gene Expression Profiling Interactive Analysis (GEPIA) web (<http://gepia.cancer-pku.cn/>). (C) The correlation between *DNMTs* in AML analyzed by Gene Expression Profiling Interactive Analysis (GEPIA) web (<http://gepia.cancer-pku.cn/>).

**Table 1. Correlation of DNMT3A/B expression with clinic-pathologic characteristics in AML.**

| Patient's parameters                    | DNMT3A expression |                  |              | DNMT3B expression |                  |              |
|-----------------------------------------|-------------------|------------------|--------------|-------------------|------------------|--------------|
|                                         | Low (n=87)        | High (n=86)      | P            | Low (n=87)        | High (n=86)      | P            |
| Sex, male/female                        | 47/40             | 45/41            | 0.879        | 47/40             | 45/41            | 0.879        |
| Median age, years (range)               | 60 (18-88)        | 54 (21-81)       | <b>0.008</b> | 58 (18-88)        | 57 (21-81)       | 0.922        |
| Median WBC, ×10 <sup>9</sup> /L (range) | 25.9 (0.8-137.2)  | 11.5 (0.4-297.4) | <b>0.063</b> | 22.2 (1-137.2)    | 10.7 (0.4-297.4) | <b>0.041</b> |
| Median PB blasts, % (range)             | 17 (0-97)         | 48 (0-98)        | <b>0.006</b> | 25 (0-94)         | 49 (0-98)        | <b>0.006</b> |
| Median BM blasts, % (range)             | 75 (30-98)        | 72 (32-100)      | 0.788        | 73 (30-99)        | 72 (30-100)      | 0.951        |
| FAB classifications                     |                   |                  | <b>0.000</b> |                   |                  | <b>0.000</b> |
| M0                                      | 3                 | 13               | 0.009        | 5                 | 11               |              |
| M1                                      | 19                | 25               |              | 11                | 33               | 0.000        |
| M2                                      | 13                | 25               | 0.028        | 17                | 21               |              |
| M3                                      | 6                 | 10               |              | 7                 | 9                |              |
| M4                                      | 25                | 9                | 0.004        | 28                | 6                | 0.000        |
| M5                                      | 16                | 2                | 0.001        | 17                | 1                | 0.000        |
| M6                                      | 1                 | 1                |              | 0                 | 2                |              |
| M7                                      | 3                 | 0                |              | 1                 | 2                |              |
| No data                                 | 1                 | 1                |              | 1                 | 1                |              |
| Cytogenetics                            |                   |                  | <b>0.000</b> |                   |                  | <b>0.000</b> |
| normal                                  | 55                | 25               | 0.000        | 42                | 38               |              |
| t(15;17)                                | 6                 | 9                |              | 7                 | 8                |              |
| t(8;21)                                 | 0                 | 7                | 0.007        | 6                 | 1                |              |
| inv(16)                                 | 2                 | 8                |              | 10                | 0                | 0.001        |
| +8                                      | 4                 | 4                |              | 3                 | 5                |              |
| del(5)                                  | 1                 | 0                |              | 0                 | 1                |              |
| -7/del(7)                               | 0                 | 7                | 0.007        | 2                 | 5                |              |
| 11q23                                   | 2                 | 1                |              | 3                 | 0                |              |
| others                                  | 5                 | 9                |              | 9                 | 5                |              |
| complex                                 | 11                | 14               |              | 4                 | 21               | 0.000        |
| No data                                 | 1                 | 2                |              | 1                 | 2                |              |
| Gene mutation                           |                   |                  |              |                   |                  |              |
| FLT3 (+/-)                              | 28/59             | 21/65            | 0.312        | 22/65             | 27/59            | 0.402        |
| NPM1 (+/-)                              | 37/50             | 11/75            | <b>0.000</b> | 24/63             | 24/62            | 1.000        |
| DNMT3A (+/-)                            | 30/57             | 12/74            | <b>0.002</b> | 20/67             | 22/64            | 0.725        |
| IDH2 (+/-)                              | 11/76             | 6/80             | 0.307        | 8/79              | 9/77             | 0.804        |
| IDH1 (+/-)                              | 11/76             | 5/81             | 0.188        | 4/83              | 12/74            | <b>0.038</b> |
| TET2 (+/-)                              | 5/82              | 10/76            | 0.188        | 8/79              | 7/79             | 1.000        |
| RUNX1 (+/-)                             | 8/79              | 7/79             | 1.000        | 9/78              | 6/80             | 0.590        |
| TP53 (+/-)                              | 8/79              | 6/80             | 0.782        | 2/85              | 12/74            | <b>0.005</b> |
| NRAS (+/-)                              | 8/79              | 4/82             | 0.370        | 7/80              | 5/81             | 0.766        |
| CEBPA (+/-)                             | 4/83              | 9/77             | 0.162        | 6/81              | 7/79             | 0.782        |
| WT1 (+/-)                               | 4/83              | 6/80             | 0.535        | 4/83              | 6/80             | 0.535        |
| PTPN11 (+/-)                            | 5/82              | 3/83             | 0.720        | 4/83              | 4/82             | 1.000        |
| KIT (+/-)                               | 1/86              | 6/80             | 0.064        | 5/82              | 2/84             | 0.443        |
| U2AF1 (+/-)                             | 4/83              | 3/83             | 1.000        | 3/84              | 4/82             | 0.720        |
| KRAS (+/-)                              | 4/83              | 3/83             | 1.000        | 4/83              | 3/83             | 1.000        |
| SMC1A (+/-)                             | 4/83              | 3/83             | 1.000        | 5/82              | 2/84             | 0.443        |
| SMC3 (+/-)                              | 4/83              | 3/83             | 1.000        | 3/84              | 4/82             | 0.720        |
| PHF6 (+/-)                              | 3/84              | 2/84             | 1.000        | 3/84              | 2/84             | 1.000        |
| STAG2 (+/-)                             | 2/85              | 3/83             | 0.682        | 2/85              | 3/83             | 0.682        |
| RAD21 (+/-)                             | 2/85              | 2/84             | 1.000        | 3/84              | 1/85             | 0.621        |

AML: acute myeloid leukemia; WBC: white blood cells; PB: peripheral blood; BM: bone marrow; FAB: French-American-British.

We next compared microRNA expression signature between high and low *DNMT3A* expression groups. A total of 88 differentially expressed microRNAs were identified consisting of 40 positively correlated microRNAs and 48 negatively correlated microRNAs (FDR<0.05,  $P<0.05$ ; Figure 6C; Supplementary Table 1). The most positively correlated microRNAs such as *miR-335*, *miR-146a*, *miR-130a*, and *miR-126* were seen as oncogenic microRNAs in AML [25–28]. Moreover, negatively correlated microRNAs including *miR-22*, *miR-29b*, *miR-9*, and *miR-429* were reported as anti-leukemia roles in AML biology [29–32]. Of these negatively correlated microRNAs, *miR-29b* and *miR-429* were identified as the predicted microRNAs that could target *DNMT3A* directly (Figure 6D, Supplementary Table 2). Obviously, further studies are required to confirm the direct connections between *DNMT3A* and *miR-429* by luciferase assay.

## DISCUSSION

In this study, we systemically analyzed *DNMTs* expression and their relationship with clinic-pathological features and prognosis in patients with AML. We found that *DNMT3A* expression was increased in AML, whereas *DNMT3B* expression was decreased in AML. Although previous

study showed *DNMTs* overexpression and its negative prognostic effects in AML [18–21], recent researches revealed that *DNMT3B* expression was decreased in AML blasts, whereas *DNMT1* and *DNMT3A* expression showed no significant differences [16, 33]. Additionally, the potential roles of *DNMT3A* and *DNMT3B* in AML remained poorly defined. Peters et al previously showed the tumor suppressor functions of *DNMT3A* and *DNMT3B* in the prevention of malignant mouse lymphopoiesis, but not in the development of myeloid malignancies [34]. However, ectopic *DNMT3B* expression was reported to delay leukemogenesis [17], and the loss of *DNMT3B* accelerated MLL-AF9 leukemia progression [16]. These studies demonstrated that *DNMT3B* played a crucial role in AML development, but may not act as a cancer-related driver gene during leukemogenesis. As for *DNMT3A*, it was indicated that *DNMT3A* loss progressively impaired HSC differentiation [13]. Notably, loss of *DNMT3A* and endogenous *KRAS*<sup>G12D/+</sup> cooperated to regulate hematopoietic stem and progenitor cell functions in leukemogenesis [35]. In our study, we also observed the significant associations of *DNMT3A* expression with other molecular events such as *NPM1* and *DNMT3A* mutations. These studies suggested that *DNMT3A* generally not worked independently in the development of AML, and it may cooperate with other molecular events.

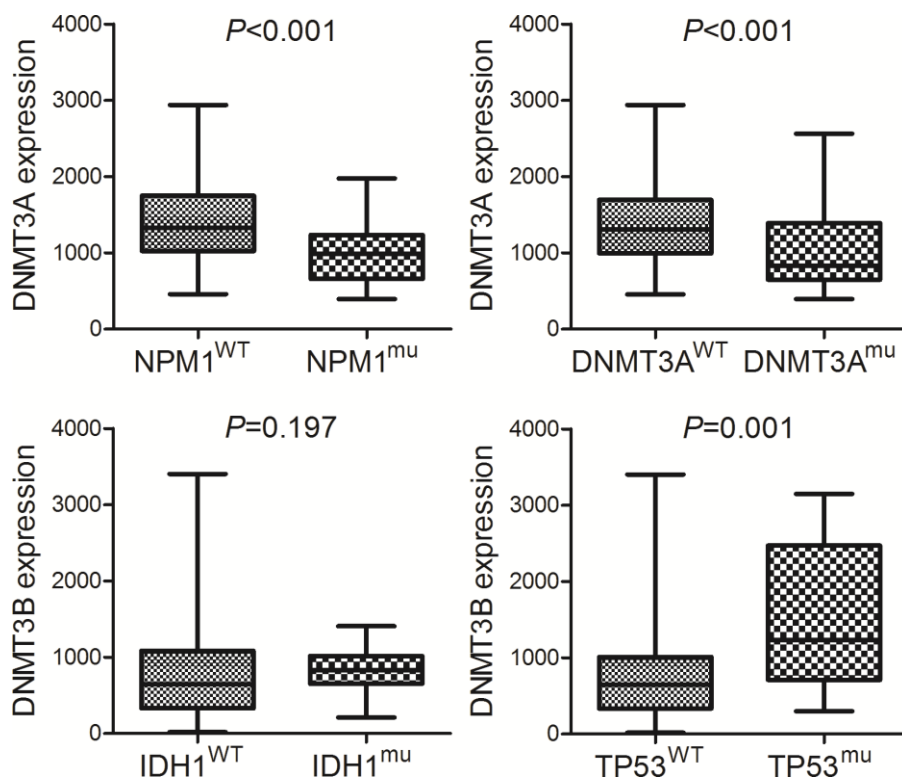

**Figure 3. The expression of *DNMT3A* and *DNMT3B* in AML patients with different molecular signature.** The expression of *DNMT3A* in AML patients with and without *NPM1* mutation as well as AML patients with and without *DNMT3A* mutation. The expression of *DNMT3B* in AML patients with and without *IDH1* mutation as well as AML patients with and without *TP53* mutation.

The prognostic value of *DNMT3A* mutation in AML has been systemically revealed. Increasing studies showed that *DNMT3A* mutations were independently associated with poor outcome in AML patients with an intermediate-risk cytogenetic profile or CN-AML [12, 36]. Moreover, loss-of-function of *DNMT3A* caused by mutations or underexpression predicted response to the HMAs decitabine treatment in AML [37]. In this study, low *DNMT3A* expression was observed to act as an independent prognostic biomarker in AML and also helpful for the selecting treatment choice between chemotherapy and HSCT. Interestingly, although two recent reports showed that high *DNMT3B* expression was a poor prognostic biomarker in AML [19, 20], we did not observe the association of aberrant *DNMT3B* expression with AML survival. The differences may be caused by the specific cell population selection and different ethnics. Obviously, prospective studies are needed to confirm and expand our results before *DNMT3A*

expression pattern can be used routinely as a potential prognostic biomarker guiding treatment choice for newly diagnosed AML.

Despite that the role of *DNMT3A* in regulation of DNA methylation is well-known, the potential mechanism regulating *DNMT3A* was poorly investigated. Jost et al reported that aberrant DNA hypermethylation within the *DNMT3A* gene was frequently observed in AML, and was associated with downregulation of *DNMT3A* mRNA transcript 2 [38]. Moreover, *DNMT3A* was also identified as a direct target of a number of microRNAs such as *miR-30a-3p*, *miR-133a-3p*, *miR-450*, *miR-29a/b/c*, and *miR-129-5p* [39–43]. From our study, we observed the direct association of two microRNAs *miR-29b* and *miR-429* with *DNMT3A* in AML. Although several studies showed the direct link between *DNMT3A* and *miR-29b* in other human cancers, little studies showed the direct correlation between *miR-429* and

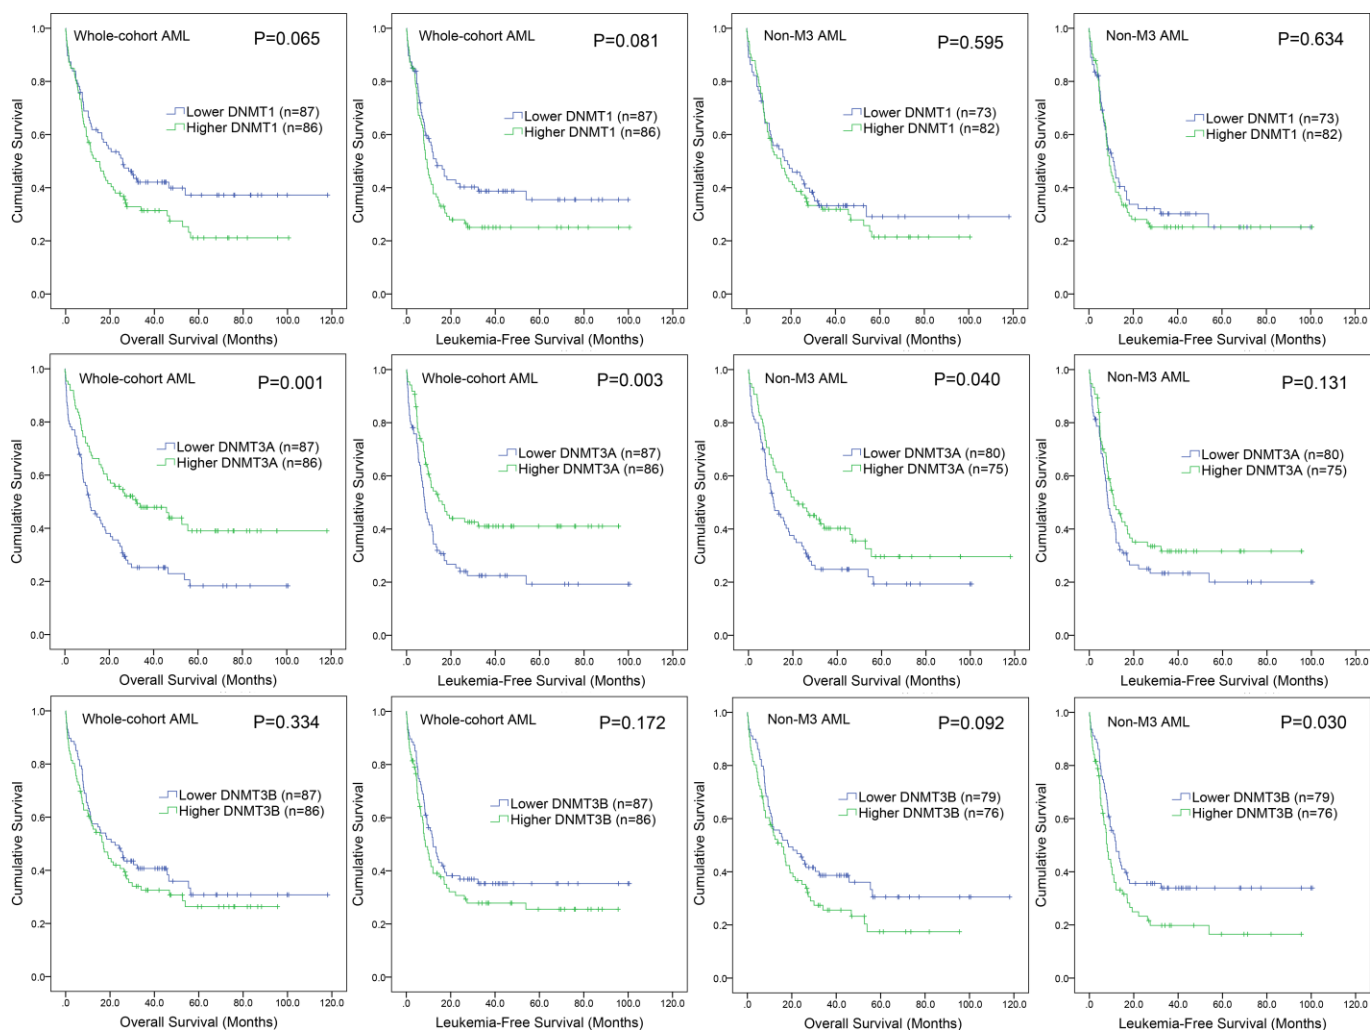

**Figure 4. The impact of *DNMTs* expression on survival of AML patients.** Kaplan–Meier survival curves of *DNMTs* expression on overall survival and leukemia-free survival in both chemotherapy and hematopoietic stem cell transplantation (HSCT) groups.

**Table 2. Cox regression analyses of variables for overall survival and leukemia-free survival in AML.**

| Variables                | Overall survival      |       | Leukemia-free survival |       |
|--------------------------|-----------------------|-------|------------------------|-------|
|                          | Hazard ratio (95% CI) | P     | Hazard ratio (95% CI)  | P     |
| <i>DNMT3A</i> expression | 0.628 (0.429-0.920)   | 0.017 | 0.696 (0.476-1.020)    | 0.063 |
| Age                      | 1.038 (1.022-1.053)   | 0.000 | 1.034 (1.019-1.049)    | 0.000 |
| WBC                      | 1.008 (1.003-1.012)   | 0.001 | 1.008 (1.004-1.012)    | 0.000 |
| Molecular risk           | 2.148 (1.537-3.000)   | 0.000 | 1.901 (1.382-2.614)    | 0.000 |
| <i>FLT3</i> mutation     | 1.686 (1.082-2.627)   | 0.021 | 1.719 (1.100-2.687)    | 0.017 |
| <i>CEBPA</i> mutation    | 1.685 (0.799-3.553)   | 0.171 | 1.732 (0.814-3.687)    | 0.154 |
| <i>NPM1</i> mutation     | 0.742 (0.425-1.297)   | 0.295 | 0.810 (0.471-1.394)    | 0.447 |
| <i>DNMT3A</i> mutation   | 1.309 (0.812-2.110)   | 0.269 | 1.134 (0.717-1.793)    | 0.592 |
| <i>RUNX1</i> mutation    | 1.940 (1.288-2.924)   | 0.002 | 1.660 (1.104-2.498)    | 0.015 |
| <i>TET2</i> mutation     | 0.767 (0.386-1.524)   | 0.448 | 0.824 (0.414-1.639)    | 0.581 |
| <i>TP53</i> mutation     | 2.900 (1.483-5.669)   | 0.002 | 2.616 (1.350-5.068)    | 0.004 |
| <i>IDH1</i> mutation     | 0.702 (0.337-1.463)   | 0.344 | 0.751 (0.344-1.639)    | 0.472 |
| <i>IDH2</i> mutation     | 0.644 (0.338-1.226)   | 0.180 | 0.649 (0.344-1.225)    | 0.183 |
| <i>ASXL1</i> mutation    | 1.779 (0.503-6.289)   | 0.372 | 1.813 (0.509-6.459)    | 0.359 |

AML: acute myeloid leukemia; CI: confidence interval; WBC: white blood cells. Variables in multivariate analysis including *DNMT3A* expression (low vs. high), age, WBC, karyotype (favorable vs. intermediate vs. poor), and gene mutations (mutant vs. wild-type).

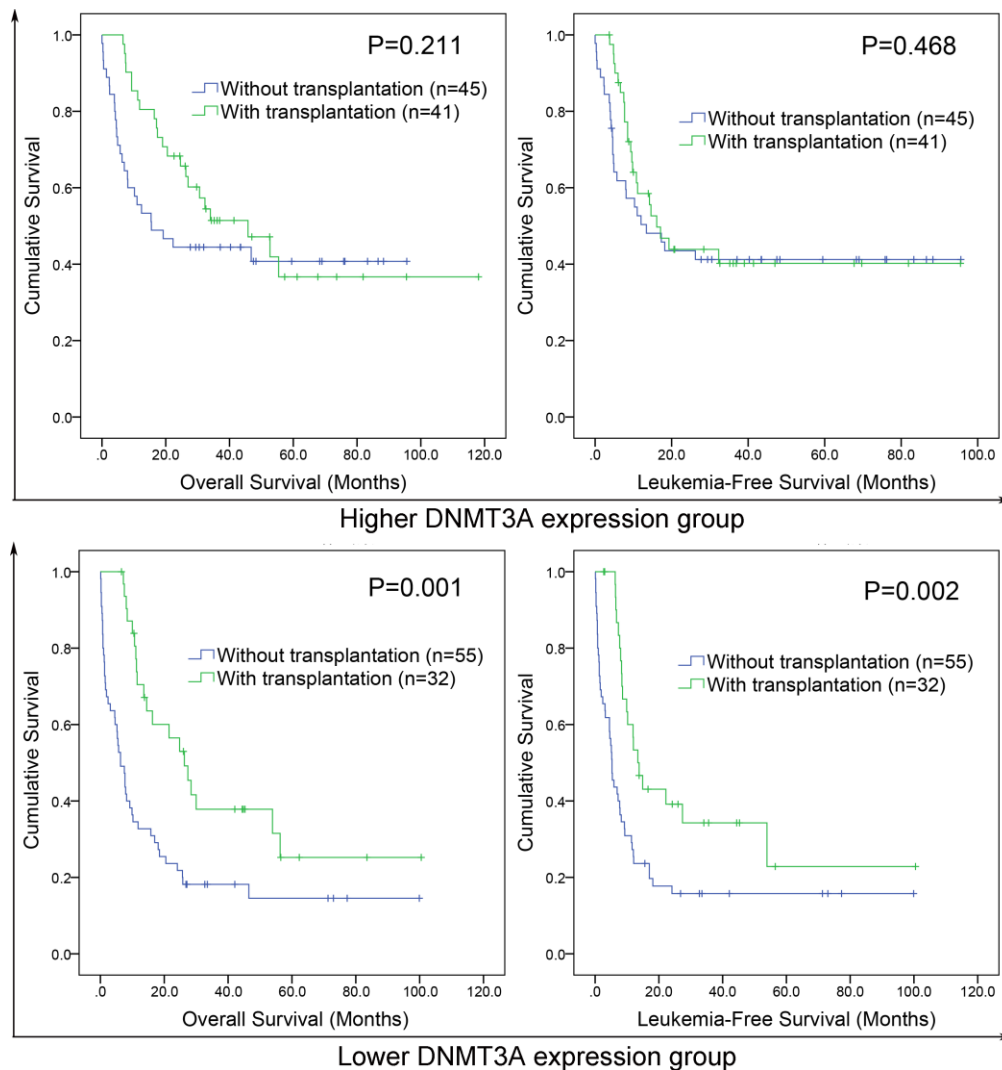

**Figure 5. The effect of hematopoietic stem cell transplantation (HSCT) on survival of AML patients among different *DNMT3A* expression groups.** Kaplan–Meier survival curves of overall survival and leukemia-free survival in low and high *DNMT3A* expression group.



*DNMT3A* in any type of human cancers. Interestingly, our previous study disclosed that *miR-429* expression was decreased in AML [32], which presented the opposite expression pattern of *DNMT3A* in AML. Accordingly, further studies are required to confirm the direct associations of *DNMT3A* with *miR-429* by luciferase assay.

In summary, although we analyzed the expression and prognosis analysis of *DNMTs* expression only by public databases, our study demonstrated that *DNMT3A* and *DNMT3B* showed significant expression differences in AML. Moreover, *DNMT3A* expression acted as a potential prognostic biomarker and may guide treatment choice between chemotherapy and HSCT in AML.

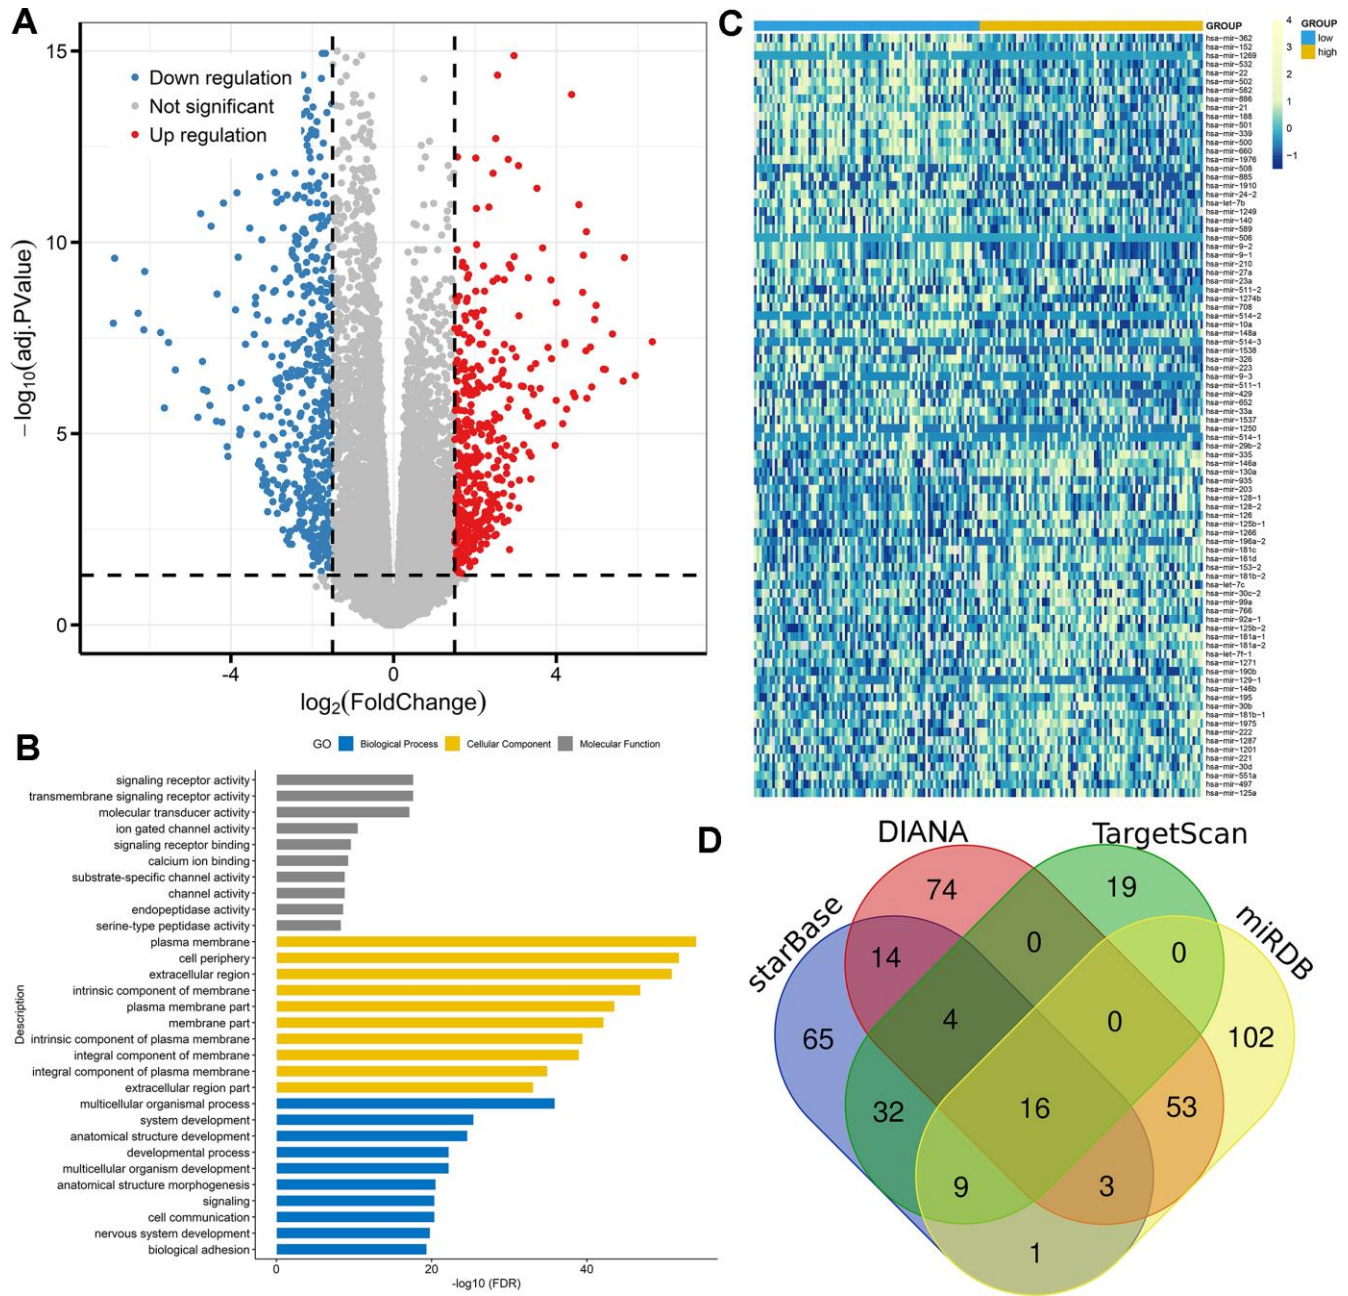

**Figure 6. Molecular signatures associated with *DNMT3A* in AML.** (A) Volcano plot of differentially expressed genes between AML patients with low and high *DNMT3A* expression (FDR<0.05,  $P<0.05$ , and  $|\log_2 \text{FC}|>1.5$ ). (B) Gene Ontology analysis of DEGs conducted using online website of STRING (<http://string-db.org>). (C) Expression heatmap of differentially expressed microRNAs between AML patients with low and high *DNMT3A* expression (FDR<0.05 and  $P<0.05$ ). (D) Venn results of microRNAs which could target *DNMT3A* predicted by DIANA ([http://diana.imis.athena-innovation.gr/DianaTools/index.php?r=microT\\_CDS/index](http://diana.imis.athena-innovation.gr/DianaTools/index.php?r=microT_CDS/index)), miRDB (<http://mirdb.org/miRDB/>), TargetScan ([http://www.targetscan.org/vert\\_72/](http://www.targetscan.org/vert_72/)), miRDB (<http://mirdb.org/>), and starBase (<http://www.sysu.edu.cn/403.html>).

## MATERIALS AND METHODS

### CCLC, HPA, and EMBL-EBI dataset

*DNMTs* expression in human cancer cell lines were assessed by the Cancer Cell Line Encyclopedia (CCLC) dataset (<https://www.broadinstitute.org/ccle>) [44] and also evaluated by The Human Protein Atlas (HPA) dataset (<https://www.proteinatlas.org/>) [45]. Moreover, *DNMTs* expression in AML cell lines was verified by the European Bioinformatics Institute (EMBL-EBI) dataset (<https://www.ebi.ac.uk>) [46].

### GEPIA dataset

*DNMTs* expression in AML patients and normal controls was analyzed by the Gene Expression Profiling Interactive Analysis (GEPIA) web (<http://gepia.cancer-pku.cn/>), whose data obtained from The Cancer Genome Atlas (TCGA) and the Genotype-Tissue Expression (GTEx) projects [47].

### Patients from TCGA datasets

A total of 173 AML patients with available *DNMTs* expression data from TCGA were identified and included in this study [15]. Clinical and molecular characteristics were collected including age, sex, white blood cell (WBC) counts, peripheral blood (PB) blasts, bone marrow (BM) blasts, French-American-British (FAB) subtypes and the frequencies of genetic mutations. After induction chemotherapy, consolidation treatment included chemotherapy (100 patients received) and hematopoietic stem cell transplantation (HSCT) (73 patients received).

### Bioinformatics analyses

The details for the identification of microRNAs targeting *DNMT3A* were reported as our previous study [48, 49].

### Statistical analyses

SPSS 22.0 were used for statistical analyses and figures creation. Mann-Whitney's *U* test was used for the comparison of continuous variables, whereas Pearson Chi-square analysis or Fisher exact test was applied for the comparison of categorical variables. The prognostic effect of *DNMTs* expression was evaluated using leukemia-free survival (LFS) and overall survival (OS) analyzed through Kaplan-Meier analysis and Cox regression analysis. The two-tailed *P* value < 0.05 in all statistical analyses was defined as statistically significant.

### Ethical approval and consent to participate

The present study approved by the Ethics Committee and Institutional Review Board of the Affiliated

People's Hospital of Jiangsu University. Written informed consents were obtained from all enrolled individuals prior to their participation.

## Abbreviations

TSGs: tumor suppressor genes; AML: acute myeloid leukemia; MDS: myelodysplastic syndromes; HMAs: hypomethylating agents; *DNMTs*: DNA methyltransferases; LSC: leukemia stem cell; HSC: hematopoietic stem cell; CCLC: Cancer Cell Line Encyclopedia; HPA: The Human Protein Atlas; EMBL-EBI: European Bioinformatics Institute; GEPIA: Gene Expression Profiling Interactive Analysis; TCGA: The Cancer Genome Atlas; GTEx: The Genotype-Tissue Expression; WBC: white blood cells; PB: peripheral blood; BM: bone marrow; FAB: French-American-British; HSCT: hematopoietic stem cell transplantation; CN-AML: cytogenetically normal AML; OS: overall survival; LFS: leukemia-free survival; DEGs: differentially expressed genes; GO: Gene Ontology.

## AUTHOR CONTRIBUTIONS

Jing-dong Zhou conceived and designed the experiments, Ting-juan Zhang, Liu-chao Zhang, Zi-jun Xu and Jing-dong Zhou analyzed the data, all authors read and approved the final manuscript.

## CONFLICTS OF INTEREST

The authors declare that they have no conflicts of interest.

## FUNDING

The work was supported by National Natural Science foundation of China (81900166, 81970118), Zhenjiang Clinical Research Center of Hematology (SS2018009). Very thanks for Prof. Jun Qian providing technical and financial support.

## REFERENCES

1. Li E, Zhang Y. DNA methylation in mammals. *Cold Spring Harb Perspect Biol.* 2014; 6:a019133. <https://doi.org/10.1101/cshperspect.a019133> PMID:[24789823](https://pubmed.ncbi.nlm.nih.gov/24789823/)
2. Kulis M, Esteller M. DNA methylation and cancer. *Adv Genet.* 2010; 70:27–56. <https://doi.org/10.1016/B978-0-12-380866-0.60002-2> PMID:[20920744](https://pubmed.ncbi.nlm.nih.gov/20920744/)
3. Kim SY, Han YK, Song JM, Lee CH, Kang K, Yi JM, Park HR. Aberrantly hypermethylated tumor suppressor genes were identified in oral squamous cell carcinoma (OSCC). *Clin Epigenetics.* 2019; 11:116.

- <https://doi.org/10.1186/s13148-019-0715-0>  
PMID:[31405379](https://pubmed.ncbi.nlm.nih.gov/31405379/)
4. Schoofs T, Müller-Tidow C. DNA methylation as a pathogenic event and as a therapeutic target in AML. *Cancer Treat Rev*. 2011 (Suppl 1); 37:S13–18.  
<https://doi.org/10.1016/j.ctrv.2011.04.013>  
PMID:[21612874](https://pubmed.ncbi.nlm.nih.gov/21612874/)
  5. Spencer DH, Russler-Germain DA, Ketkar S, Helton NM, Lamprecht TL, Fulton RS, Fronick CC, O’Laughlin M, Heath SE, Shinawi M, Westervelt P, Payton JE, Wartman LD, et al. CpG island hypermethylation mediated by DNMT3A is a consequence of AML progression. *Cell*. 2017; 168:801–16.e13.  
<https://doi.org/10.1016/j.cell.2017.01.021>  
PMID:[28215704](https://pubmed.ncbi.nlm.nih.gov/28215704/)
  6. Jiang Y, Dunbar A, Gondek LP, Mohan S, Rataul M, O’Keefe C, Sekeres M, Sauntharajah Y, Maciejewski JP. Aberrant DNA methylation is a dominant mechanism in MDS progression to AML. *Blood*. 2009; 113:1315–25.  
<https://doi.org/10.1182/blood-2008-06-163246>  
PMID:[18832655](https://pubmed.ncbi.nlm.nih.gov/18832655/)
  7. Daver N, Boddu P, Garcia-Manero G, Yadav SS, Sharma P, Allison J, Kantarjian H. Hypomethylating agents in combination with immune checkpoint inhibitors in acute myeloid leukemia and myelodysplastic syndromes. *Leukemia*. 2018; 32:1094–105.  
<https://doi.org/10.1038/s41375-018-0070-8>  
PMID:[29487386](https://pubmed.ncbi.nlm.nih.gov/29487386/)
  8. Yang L, Rau R, Goodell MA. DNMT3A in haematological Malignancies. *Nat Rev Cancer*. 2015; 15:152–65.  
<https://doi.org/10.1038/nrc3895>  
PMID:[25693834](https://pubmed.ncbi.nlm.nih.gov/25693834/)
  9. Okano M, Xie S, Li E. Cloning and characterization of a family of novel mammalian DNA (cytosine-5) methyltransferases. *Nat Genet*. 1998; 19:219–20.  
<https://doi.org/10.1038/890> PMID:[9662389](https://pubmed.ncbi.nlm.nih.gov/9662389/)
  10. Brunetti L, Gundry MC, Goodell MA. DNMT3A in leukemia. *Cold Spring Harb Perspect Med*. 2017; 7:a030320.  
<https://doi.org/10.1101/cshperspect.a030320>  
PMID:[28003281](https://pubmed.ncbi.nlm.nih.gov/28003281/)
  11. Trowbridge JJ, Sinha AU, Zhu N, Li M, Armstrong SA, Orkin SH. Haploinsufficiency of Dnmt1 impairs leukemia stem cell function through derepression of bivalent chromatin domains. *Genes Dev*. 2012; 26:344–49.  
<https://doi.org/10.1101/gad.184341.111>  
PMID:[22345515](https://pubmed.ncbi.nlm.nih.gov/22345515/)
  12. Ley TJ, Ding L, Walter MJ, McLellan MD, Lamprecht T, Larson DE, Kandoth C, Payton JE, Baty J, Welch J, Harris CC, Lichti CF, Townsend RR, et al. DNMT3A mutations in acute myeloid leukemia. *N Engl J Med*. 2010; 363:2424–33.  
<https://doi.org/10.1056/NEJMoa1005143>  
PMID:[21067377](https://pubmed.ncbi.nlm.nih.gov/21067377/)
  13. Challen GA, Sun D, Jeong M, Luo M, Jelinek J, Berg JS, Bock C, Vasanthakumar A, Gu H, Xi Y, Liang S, Lu Y, Darlington GJ, et al. Dnmt3a is essential for hematopoietic stem cell differentiation. *Nat Genet*. 2011; 44:23–31.  
<https://doi.org/10.1038/ng.1009> PMID:[22138693](https://pubmed.ncbi.nlm.nih.gov/22138693/)
  14. Dai YJ, Wang YY, Huang JY, Xia L, Shi XD, Xu J, Lu J, Su XB, Yang Y, Zhang WN, Wang PP, Wu SF, Huang T, et al. Conditional knockin of Dnmt3a R878H initiates acute myeloid leukemia with mTOR pathway involvement. *Proc Natl Acad Sci USA*. 2017; 114:5237–42.  
<https://doi.org/10.1073/pnas.1703476114>  
PMID:[28461508](https://pubmed.ncbi.nlm.nih.gov/28461508/)
  15. Ley TJ, Miller C, Ding L, Raphael BJ, Mungall AJ, Robertson A, Hoadley K, Triche TJ Jr, Laird PW, Baty JD, Fulton LL, Fulton R, Heath SE, et al, and Cancer Genome Atlas Research Network. Genomic and epigenomic landscapes of adult de novo acute myeloid leukemia. *N Engl J Med*. 2013; 368:2059–74.  
<https://doi.org/10.1056/NEJMoa1301689>  
PMID:[23634996](https://pubmed.ncbi.nlm.nih.gov/23634996/)
  16. Zheng Y, Zhang H, Wang Y, Li X, Lu P, Dong F, Pang Y, Ma S, Cheng H, Hao S, Tang F, Yuan W, Zhang X, Cheng T. Loss of Dnmt3b accelerates MLL-AF9 leukemia progression. *Leukemia*. 2016; 30:2373–84.  
<https://doi.org/10.1038/leu.2016.112> PMID:[27133822](https://pubmed.ncbi.nlm.nih.gov/27133822/)
  17. Stanley RF, Steidl U. Ectopic DNMT3B expression delays leukemogenesis. *Blood*. 2016; 127:1525–26.  
<https://doi.org/10.1182/blood-2016-01-692137>  
PMID:[27013212](https://pubmed.ncbi.nlm.nih.gov/27013212/)
  18. Mizuno S, Chijiwa T, Okamura T, Akashi K, Fukumaki Y, Niho Y, Sasaki H. Expression of DNA methyltransferases DNMT1, 3A, and 3B in normal hematopoiesis and in acute and chronic myelogenous leukemia. *Blood*. 2001; 97:1172–79.  
<https://doi.org/10.1182/blood.v97.5.1172>  
PMID:[11222358](https://pubmed.ncbi.nlm.nih.gov/11222358/)
  19. Hayette S, Thomas X, Jallades L, Chabane K, Charlot C, Tigaud I, Gazzo S, Morisset S, Cornillet-Lefebvre P, Plesa A, Huet S, Renneville A, Salles G, et al. High DNA methyltransferase DNMT3B levels: a poor prognostic marker in acute myeloid leukemia. *PLoS One*. 2012; 7:e51527.  
<https://doi.org/10.1371/journal.pone.0051527>  
PMID:[23251566](https://pubmed.ncbi.nlm.nih.gov/23251566/)
  20. Niederwieser C, Kohlschmidt J, Volinia S, Whitman SP, Metzeler KH, Eisfeld AK, Maharry K, Yan P, Frankhouser D, Becker H, Schwind S, Carroll AJ, Nicolet D, et al.

- Prognostic and biologic significance of DNMT3B expression in older patients with cytogenetically normal primary acute myeloid leukemia. *Leukemia*. 2015; 29:567–75.  
<https://doi.org/10.1038/leu.2014.267>  
PMID:25204569
21. Lin N, Fu W, Zhao C, Li B, Yan X, Li Y. Biologico-clinical significance of DNMT3A variants expression in acute myeloid leukemia. *Biochem Biophys Res Commun*. 2017; 494:270–77.  
<https://doi.org/10.1016/j.bbrc.2017.10.041>  
PMID:29024628
22. Larmonie NS, Arentsen-Peters TC, Obulkasim A, Valerio D, Sonneveld E, Danen-van Oorschot AA, de Haas V, Reinhardt D, Zimmermann M, Trka J, Baruchel A, Pieters R, van den Heuvel-Eibrink MM, et al. MN1 overexpression is driven by loss of DNMT3B methylation activity in inv(16) pediatric AML. *Oncogene*. 2018; 37:107–15.  
<https://doi.org/10.1038/onc.2017.293>  
PMID:28892045
23. Morita K, Masamoto Y, Kataoka K, Koya J, Kagoya Y, Yashiroda H, Sato T, Murata S, Kurokawa M. BAALC potentiates oncogenic ERK pathway through interactions with MEKK1 and KLF4. *Leukemia*. 2015; 29:2248–56.  
<https://doi.org/10.1038/leu.2015.137>  
PMID:26050649
24. Zhang TJ, Zhou JD, Zhang W, Lin J, Ma JC, Wen XM, Yuan Q, Li XX, Xu ZJ, Qian J. H19 overexpression promotes leukemogenesis and predicts unfavorable prognosis in acute myeloid leukemia. *Clin Epigenetics*. 2018; 10:47.  
<https://doi.org/10.1186/s13148-018-0486-z>  
PMID:29643943
25. Zhou JD, Li XX, Zhang TJ, Xu ZJ, Zhang ZH, Gu Y, Wen XM, Zhang W, Ji RB, Deng ZQ, Lin J, Qian J. MicroRNA-335/ ID4 dysregulation predicts clinical outcome and facilitates leukemogenesis by activating PI3K/Akt signaling pathway in acute myeloid leukemia. *Aging (Albany NY)*. 2019; 11:3376–91.  
<https://doi.org/10.18632/aging.101991>  
PMID:31147526
26. Su YL, Wang X, Mann M, Adamus TP, Wang D, Moreira DF, Zhang Z, Ouyang C, He X, Zhang B, Swiderski PM, Forman SJ, Baltimore D, et al. Myeloid cell-targeted miR-146a mimic inhibits NF- $\kappa$ B-driven inflammation and leukemia progression in vivo. *Blood*. 2020; 135:167–180.  
<https://doi.org/10.1182/blood.2019002045>  
PMID:31805184
27. Mammoli F, Parenti S, Lomiento M, Gemelli C, Atene CG, Grande A, Corradini R, Manicardi A, Fantini S, Zanocco-Marani T, Ferrari S. Physiological expression of miR-130a during differentiation of CD34<sup>+</sup> human hematopoietic stem cells results in the inhibition of monocyte differentiation. *Exp Cell Res*. 2019; 382:111445.  
<https://doi.org/10.1016/j.yexcr.2019.05.026>  
PMID:31152707
28. Raffel S, Trumpp A. miR-126 drives quiescence and self-renewal in leukemic stem cells. *Cancer Cell*. 2016; 29:133–35.  
<https://doi.org/10.1016/j.ccell.2016.01.007>  
PMID:26859449
29. Jiang X, Hu C, Arnovitz S, Bugno J, Yu M, Zuo Z, Chen P, Huang H, Ulrich B, Gurbuxani S, Weng H, Strong J, Wang Y, et al. miR-22 has a potent anti-tumour role with therapeutic potential in acute myeloid leukaemia. *Nat Commun*. 2016; 7:11452.  
<https://doi.org/10.1038/ncomms11452> PMID:27116251
30. Gong JN, Yu J, Lin HS, Zhang XH, Yin XL, Xiao Z, Wang F, Wang XS, Su R, Shen C, Zhao HL, Ma YN, Zhang JW. The role, mechanism and potentially therapeutic application of microRNA-29 family in acute myeloid leukemia. *Cell Death Differ*. 2014; 21:100–12.  
<https://doi.org/10.1038/cdd.2013.133>  
PMID:24076586
31. Zhu B, Xi X, Liu Q, Cheng Y, Yang H. MiR-9 functions as a tumor suppressor in acute myeloid leukemia by targeting CX chemokine receptor 4. *Am J Transl Res*. 2019; 11:3384–97.  
PMID:31312352
32. Zhou JD, Zhang LC, Zhang TJ, Gu Y, Wu DH, Zhang W, Ma JC, Wen XM, Guo H, Lin J, Qian J. Dysregulation of miR-200s clusters as potential prognostic biomarkers in acute myeloid leukemia. *J Transl Med*. 2018; 16:135.  
<https://doi.org/10.1186/s12967-018-1494-7>  
PMID:29784043
33. Schulze I, Rohde C, Scheller-Wendorff M, Bäumer N, Krause A, Herbst F, Riemke P, Hebestreit K, Tschanter P, Lin Q, Linhart H, Godley LA, Glimm H, et al. Increased DNA methylation of Dnmt3b targets impairs leukemogenesis. *Blood*. 2016; 127:1575–86.  
<https://doi.org/10.1182/blood-2015-07-655928>  
PMID:26729896
34. Peters SL, Hlady RA, Opavska J, Klinkebiel D, Pirruccello SJ, Talmon GA, Sharp JG, Wu L, Jaenisch R, Simpson MA, Karpf AR, Opavsky R. Tumor suppressor functions of Dnmt3a and Dnmt3b in the prevention of Malignant mouse lymphopoiesis. *Leukemia*. 2014; 28:1138–42.  
<https://doi.org/10.1038/leu.2013.364>  
PMID:24292811
35. Chang YI, You X, Kong G, Ranheim EA, Wang J, Du J, Liu Y, Zhou Y, Ryu MJ, Zhang J. Loss of Dnmt3a and

- endogenous *kras*(G12D/+) cooperate to regulate hematopoietic stem and progenitor cell functions in leukemogenesis. *Leukemia*. 2015; 29:1847–56.  
<https://doi.org/10.1038/leu.2015.85>  
 PMID:25801914
36. Thol F, Damm F, Lüdeking A, Winschel C, Wagner K, Morgan M, Yun H, Göhring G, Schlegelberger B, Hoelzer D, Lübbert M, Kanz L, Fiedler W, et al. Incidence and prognostic influence of DNMT3A mutations in acute myeloid leukemia. *J Clin Oncol*. 2011; 29:2889–96.  
<https://doi.org/10.1200/JCO.2011.35.4894>  
 PMID:21670448
  37. Metzeler KH, Walker A, Geyer S, Garzon R, Klisovic RB, Bloomfield CD, Blum W, Marcucci G. DNMT3A mutations and response to the hypomethylating agent decitabine in acute myeloid leukemia. *Leukemia*. 2012; 26:1106–07.  
<https://doi.org/10.1038/leu.2011.342>  
 PMID:22124213
  38. Jost E, Lin Q, Weidner CI, Wilop S, Hoffmann M, Walenda T, Schemionek M, Herrmann O, Zenke M, Brümmendorf TH, Koschmieder S, Wagner W. Epimutations mimic genomic mutations of DNMT3A in acute myeloid leukemia. *Leukemia*. 2014; 28:1227–34.  
<https://doi.org/10.1038/leu.2013.362>  
 PMID:24280869
  39. Wei D, Yu G, Zhao Y. MicroRNA-30a-3p inhibits the progression of lung cancer via the PI3K/AKT by targeting DNA methyltransferase 3a. *Onco Targets Ther*. 2019; 12:7015–24.  
<https://doi.org/10.2147/OTT.S213583>  
 PMID:31695416
  40. Shi W, Tang T, Li X, Deng S, Li R, Wang Y, Wang Y, Xia T, Zhang Y, Zen K, Jin L, Pan Y. Methylation-mediated silencing of miR-133a-3p promotes breast cancer cell migration and stemness via miR-133a-3p/MAML1/DNMT3A positive feedback loop. *J Exp Clin Cancer Res*. 2019; 38:429.  
<https://doi.org/10.1186/s13046-019-1400-z>  
 PMID:31660998
  41. Wang Y, Wang L, Yu X, Duan J. Overexpression of miR-450 affects the biological behavior of HepG2 cells by targeting DNMT3a. *Onco Targets Ther*. 2019; 12:5069–76.  
<https://doi.org/10.2147/OTT.S203206>  
 PMID:31303764
  42. Zhu Y, Zheng G, Wang H, Jia Y, Zhang Y, Tang Y, Li W, Fan Y, Zhang X, Liu Y, Liu S. Downregulated miR-29a/b/c during contact inhibition stage promote 3T3-L1 adipogenesis by targeting DNMT3A. *PLoS One*. 2017; 12:e0170636.  
<https://doi.org/10.1371/journal.pone.0170636>  
 PMID:28114345
  43. Gu X, Gong H, Shen L, Gu Q. MicroRNA-129-5p inhibits human glioma cell proliferation and induces cell cycle arrest by directly targeting DNMT3A. *Am J Transl Res*. 2018; 10:2834–47.  
 PMID:30323870
  44. Barretina J, Caponigro G, Stransky N, Venkatesan K, Margolin AA, Kim S, Wilson CJ, Lehár J, Kryukov GV, Sonkin D, Reddy A, Liu M, Murray L, et al. The cancer cell line encyclopedia enables predictive modelling of anticancer drug sensitivity. *Nature*. 2012; 483:603–07.  
<https://doi.org/10.1038/nature11003>  
 PMID:22460905
  45. Uhlén M, Björling E, Agaton C, Szigartyo CA, Amini B, Andersen E, Andersson AC, Angelidou P, Asplund A, Asplund C, Berglund L, Bergström K, Brumer H, et al. A human protein atlas for normal and cancer tissues based on antibody proteomics. *Mol Cell Proteomics*. 2005; 4:1920–32.  
<https://doi.org/10.1074/mcp.M500279-MCP200>  
 PMID:16127175
  46. Li W, Cowley A, Uludag M, Gur T, McWilliam H, Squizzato S, Park YM, Buso N, Lopez R. The EMBL-EBI bioinformatics web and programmatic tools framework. *Nucleic Acids Res*. 2015; 43:W580–84.  
<https://doi.org/10.1093/nar/gkv279>  
 PMID:25845596
  47. Tang Z, Li C, Kang B, Gao G, Li C, Zhang Z. GEPIA: a web server for cancer and normal gene expression profiling and interactive analyses. *Nucleic Acids Res*. 2017; 45:W98–102.  
<https://doi.org/10.1093/nar/gkx247>  
 PMID:28407145
  48. Zhou JD, Zhang TJ, Xu ZJ, Gu Y, Ma JC, Li XX, Guo H, Wen XM, Zhang W, Yang L, Liu XH, Lin J, Qian J. BCL2 overexpression: clinical implication and biological insights in acute myeloid leukemia. *Diagn Pathol*. 2019; 14:68.  
<https://doi.org/10.1186/s13000-019-0841-1>  
 PMID:31253168
  49. Chu MQ, Zhang TJ, Xu ZJ, Gu Y, Ma JC, Zhang W, Wen XM, Lin J, Qian J, Zhou JD. EZH2 dysregulation: potential biomarkers predicting prognosis and guiding treatment choice in acute myeloid leukaemia. *J Cell Mol Med*. 2020; 24:1640–49.  
<https://doi.org/10.1111/jcmm.14855>  
 PMID:31794134

## SUPPLEMENTARY MATERIALS

### Supplementary Tables

Please browse Full Text version to see the data of Supplementary Table 1 and 2.

**Supplementary Table 1. Different expressed genes and microRNAs between low and high *DNMT3A* expression groups.**

**Supplementary Table 2. Venn results of microRNAs targeting *DNMT3A*.**
