# Supplementary material for: Expression and prognosis analysis of DNMT family in acute myeloid leukemia
Source: Aging (Albany NY). 2020 Jun 26;12(14):14677–90. doi: 10.18632/aging.103520 (PMC7425446; doi:10.18632/aging.103520)
Supplement: Supplementary Table 1 [file aging-12-103520-s002..xlsx]

## Sheet: Possitively correlated genes
Supplementary Table 1. Different expressed genes and microRNAs between low and high DNMT3A expression groups.
logFC	logCPM	PValue	FDR	gene	ID
7.13911	5.42498	3.09516e-32	3.08588e-28	POU4F1	5457
3.04258	4.86105	5.0878e-24	1.69084e-20	CLIP3	25999
3.23111	0.861019	3.32644e-21	4.42195e-18	KCNK12	56660
3.18223	2.28814	6.04687e-20	4.01915e-17	PNMA5	114824
3.48509	0.424747	1.98488e-18	9.42344e-16	LOC116437	116437
2.96093	0.628426	3.18504e-18	1.32312e-15	APLN	8862
2.55427	3.28768	1.13768e-17	4.28025e-15	CACNA2D2	9254
4.3758	0.483733	4.20144e-17	1.37339e-14	DLL3	10683
2.51007	2.05819	9.80963e-16	1.93667e-13	LGR6	59352
1.56922	1.21595	3.56286e-15	5.90361e-13	FAM180B	399888
8.04765	1.0634	3.75182e-15	6.13207e-13	KCNH6	81033
2.01973	2.32068	3.92555e-15	6.31254e-13	RAG1	5896
2.81701	1.81619	4.29588e-15	6.79841e-13	LAMC3	10319
3.07037	-0.685159	6.45085e-15	9.97131e-13	GABRR1	2569
2.44309	4.2277	1.13676e-14	1.5741e-12	UMODL1	89766
3.52449	-0.808232	3.09902e-14	3.88645e-12	CLEC2L	154790
4.55675	0.278028	1.01953e-13	1.04254e-11	RASAL1	8437
2.3419	1.94368	1.21694e-13	1.20725e-11	MMP28	79148
2.03484	3.2681	1.33049e-13	1.30689e-11	NT5E	4907
4.7373	-0.485655	6.66233e-13	5.2927e-11	TPO	7173
2.03907	2.19653	1.6019e-12	1.14487e-10	KCNA6	3742
3.66152	2.37161	2.0071e-12	1.40921e-10	COL2A1	1280
1.56117	1.40224	2.27767e-12	1.56436e-10	PCDHGA12	26025
4.66647	3.69499	3.40908e-12	2.18576e-10	MYO18B	84700
2.96371	-2.36991	3.75884e-12	2.37187e-10	PGPEP1L	145814
5.67158	-0.920855	4.03052e-12	2.51939e-10	IRX6	79190
1.69651	4.19093	5.53599e-12	3.33497e-10	STK32B	55351
2.84285	-0.748398	6.43915e-12	3.84421e-10	ZDHHC8P1	150244
2.21145	2.87681	6.98311e-12	4.11962e-10	PCSK6	5046
1.68755	4.40175	7.19155e-12	4.20527e-10	ZNF608	57507
1.77524	5.57832	7.90551e-12	4.5958e-10	FGFR1	2260
2.88543	-0.331358	8.17557e-12	4.73898e-10	PRSS1	5644
1.84418	1.76786	1.26711e-11	7.01835e-10	CORO2B	10391
3.30957	0.143246	1.55485e-11	8.4249e-10	LOC100131551	100131551
1.81351	6.87925	1.60085e-11	8.598e-10	SHANK3	85358
2.54888	2.94105	1.64618e-11	8.77668e-10	CACNA1H	8912
2.71991	1.45382	1.81217e-11	9.48414e-10	FLNC	2318
3.86747	1.43229	1.86121e-11	9.66472e-10	PREX2	80243
2.44578	-0.863901	2.02926e-11	1.051e-09	PTH1R	5745
2.01842	0.4968	4.01284e-11	1.88975e-09	GUCY1B2	2974
2.23691	-0.592708	4.01832e-11	1.88975e-09	KLRG2	346689
4.64598	-1.47886	4.4128e-11	2.03213e-09	CTNND2	1501
1.61091	5.14112	5.76202e-11	2.57611e-09	MYO5C	55930
1.52723	6.98026	5.95804e-11	2.64274e-09	MEST	4232
1.81121	0.040836	6.63553e-11	2.88262e-09	AVPR1B	553
1.55626	2.62428	8.24249e-11	3.4821e-09	CD19	930
1.79132	2.3549	8.36646e-11	3.51252e-09	LOX	4015
3.99788	-1.34915	9.20728e-11	3.76173e-09	C18orf26	284254
4.97754	-0.109242	1.11865e-10	4.44339e-09	GDA	9615
2.20165	0.082114	1.55387e-10	5.96997e-09	C2orf85	285093
2.03756	3.22608	1.81582e-10	6.89666e-09	TRO	7216
1.91447	6.12091	1.86065e-10	7.02734e-09	MN1	4330
1.75037	0.118695	2.24965e-10	8.31493e-09	RHOXF2B	727940
3.08162	6.18576	2.25179e-10	8.31493e-09	TRH	7200
2.017	4.99074	2.39323e-10	8.80006e-09	SHANK1	50944
4.94349	3.49056	2.90028e-10	1.04389e-08	RUNX1T1	862
1.77435	3.22311	3.05648e-10	1.09223e-08	TMIGD2	126259
2.11737	1.70002	3.9958e-10	1.36666e-08	CTSE	1510
2.09748	1.29532	4.53521e-10	1.52757e-08	CSRP2	1466
1.61947	2.08744	5.2317e-10	1.74448e-08	MCF2L	23263
1.50539	1.74146	5.36912e-10	1.78534e-08	AFAP1L2	84632
2.28988	2.13149	7.2477e-10	2.30493e-08	LHX6	26468
1.58472	0.750567	7.31169e-10	2.31421e-08	SPEG	10290
5.37837	-1.84794	7.97432e-10	2.4962e-08	POU3F3	5455
1.73072	6.20884	8.19125e-10	2.55945e-08	CYTL1	54360
1.87373	-0.851561	1.02048e-09	3.12093e-08	ACR	49
1.92074	3.92723	1.1829e-09	3.56839e-08	ROBO4	54538
6.35896	-0.473493	1.33532e-09	3.97407e-08	ATP1B4	23439
4.2122	-1.69944	1.41711e-09	4.1468e-08	FOXC2	2303
1.84054	2.70259	1.4522e-09	4.22727e-08	KIF26A	26153
2.18845	-2.24724	1.60087e-09	4.59962e-08	UROC1	131669
2.12634	1.43757	1.6228e-09	4.63695e-08	MUC4	4585
4.20986	-0.390718	1.63225e-09	4.63695e-08	GAB4	128954
2.72134	-0.888425	1.65402e-09	4.68482e-08	PRINS	100169750
4.83558	-2.45054	1.9717e-09	5.50641e-08	OVCH2	341277
3.79256	0.34642	2.01508e-09	5.58841e-08	RAG2	5897
2.91549	-1.74169	2.19956e-09	6.01635e-08	WSCD2	9671
4.72687	0.613966	2.57468e-09	6.89117e-08	TRY6	154754
1.62364	3.08614	2.69601e-09	7.15824e-08	PCDHGB2	56103
2.50148	-0.281534	2.77607e-09	7.31492e-08	GABRD	2563
3.00764	-1.89257	3.89197e-09	9.92404e-08	TMEM212	389177
3.88257	1.57048	4.35905e-09	1.10164e-07	RORB	6096
2.65922	-1.51949	4.68573e-09	1.17231e-07	SEMA5B	54437
1.56299	-0.773907	4.79512e-09	1.19518e-07	PROZ	8858
2.42157	1.96478	4.93276e-09	1.22642e-07	LOC84740	84740
1.73912	1.39331	5.60598e-09	1.36155e-07	DLL1	28514
1.53391	5.92363	6.08634e-09	1.46043e-07	IKZF2	22807
1.57137	0.349564	6.14815e-09	1.47172e-07	FAM154B	283726
3.48886	-2.03374	6.25133e-09	1.49105e-07	C2CD4C	126567
1.71592	0.929511	6.42278e-09	1.52465e-07	CYGB	114757
2.07068	-0.629715	7.4015e-09	1.72012e-07	TMPRSS3	64699
3.36852	-1.53973	8.63409e-09	1.98117e-07	ABCC8	6833
1.92613	5.14716	9.0295e-09	2.06353e-07	CRHBP	1393
1.65701	5.56396	9.03443e-09	2.06353e-07	C1QTNF4	114900
5.15786	-2.42841	9.07221e-09	2.06979e-07	GSX1	219409
2.13287	0.254549	9.22049e-09	2.09882e-07	MUC16	94025
5.20331	-0.966836	9.29161e-09	2.1126e-07	CNTNAP5	129684
1.7587	4.52567	9.35149e-09	2.12379e-07	EVPL	2125
2.68811	-1.18829	9.9448e-09	2.23113e-07	FAM83B	222584
1.55952	2.31847	1.09373e-08	2.39396e-07	EBF1	1879
2.66276	-2.08472	1.24259e-08	2.66388e-07	SLC38A3	10991
5.94308	-0.678331	1.44228e-08	3.04329e-07	EPYC	1833
1.95084	3.90463	1.45213e-08	3.06082e-07	FLT4	2324
1.87008	2.21102	1.53147e-08	3.201e-07	MEGF10	84466
1.77692	0.331196	1.6593e-08	3.43221e-07	FUT6	2528
2.57775	4.35349	1.79352e-08	3.67551e-07	ST18	9705
2.51446	-1.62553	1.89853e-08	3.8748e-07	C19orf33	64073
5.64223	0.483671	2.0913e-08	4.22927e-07	FAM163A	148753
1.56609	5.04331	2.10009e-08	4.24274e-07	AIF1L	83543
1.7454	-0.912774	2.10409e-08	4.24652e-07	SP7	121340
2.0806	2.12147	2.31615e-08	4.6323e-07	HLF	3131
2.68906	1.87679	2.63496e-08	5.16628e-07	CDH4	1002
1.79805	0.222259	2.88078e-08	5.57265e-07	ZNF423	23090
2.8231	0.519463	2.89358e-08	5.58624e-07	SLC26A9	115019
2.14374	4.02518	2.89981e-08	5.59209e-07	TSPAN7	7102
3.14334	-0.647188	2.96357e-08	5.70402e-07	PDE10A	10846
2.09727	-2.2117	3.02627e-08	5.80788e-07	C10orf129	142827
3.18729	-1.79993	3.06388e-08	5.86312e-07	IRX2	153572
4.86968	-0.87175	3.16879e-08	6.0407e-07	FOXF1	2294
2.3749	-0.812782	3.1805e-08	6.05723e-07	FER1L6	654463
1.84459	3.31469	3.33828e-08	6.30952e-07	CAV1	857
2.21129	4.53884	3.45482e-08	6.47453e-07	SPON1	10418
3.37869	1.48239	3.50433e-08	6.54273e-07	PADI3	51702
3.59985	-1.41022	3.54331e-08	6.60932e-07	TBX4	9496
2.0018	-0.866484	4.00198e-08	7.39568e-07	DUSP15	128853
1.72241	-2.52746	4.151e-08	7.62163e-07	OR13C9	286362
2.01002	-1.77978	4.37818e-08	8.00191e-07	DSCAML1	57453
1.99283	2.06106	4.49209e-08	8.18759e-07	SORCS1	114815
1.88083	-0.413314	4.56601e-08	8.29957e-07	HR	55806
2.05227	-1.30105	4.71491e-08	8.50817e-07	CATSPERB	79820
4.41692	-2.59116	4.84035e-08	8.67955e-07	NDST4	64579
1.72686	1.57153	4.90295e-08	8.77601e-07	ADAMTS7	11173
1.53782	-0.206371	5.14836e-08	9.14307e-07	IGLON5	402665
3.43759	-0.569275	5.32868e-08	9.4364e-07	GABRA2	2555
1.94475	8.65067	5.50751e-08	9.69282e-07	CD34	947
1.87085	6.42864	5.55861e-08	9.76334e-07	BAALC	79870
4.45576	-2.58808	6.20872e-08	1.08408e-06	CDH18	1016
4.74971	-2.29792	6.8544e-08	1.18643e-06	KC6	641516
2.86205	0.553587	7.49966e-08	1.29063e-06	NTRK3	4916
1.58767	-1.75591	7.77339e-08	1.33163e-06	ERAS	3266
3.99563	-2.59278	7.8805e-08	1.34882e-06	SOX1	6656
1.90257	-0.677319	1.06942e-07	1.76818e-06	GDF10	2662
1.53746	3.07774	1.21937e-07	1.97998e-06	NBL1	4681
2.80906	-1.23935	1.27718e-07	2.06104e-06	ZSCAN4	201516
4.24994	-2.11623	1.45819e-07	2.2967e-06	BBOX1	8424
1.64137	-2.18742	1.56904e-07	2.45771e-06	F10	2159
1.51472	2.83767	1.59641e-07	2.4947e-06	VANGL2	57216
1.74677	0.645797	1.61847e-07	2.52128e-06	FAM198A	729085
3.25166	-2.0903	1.69157e-07	2.61725e-06	HOXC10	3226
1.89415	0.357724	1.765e-07	2.71559e-06	TINAGL1	64129
2.48613	-1.19311	2.03461e-07	3.06652e-06	CXorf22	170063
3.31028	0.977782	2.38513e-07	3.51251e-06	PRSS3	5646
2.55692	-2.45598	2.5243e-07	3.67943e-06	TTLL8	164714
2.60911	-2.85803	2.66756e-07	3.84608e-06	EPHA7	2045
1.80542	-1.89476	2.97877e-07	4.24869e-06	C8orf56	157556
2.47687	-2.23794	3.18867e-07	4.52219e-06	IQCA1	79781
1.56971	3.29096	3.35378e-07	4.73279e-06	TRIM71	131405
1.75358	-2.5184	3.44436e-07	4.8469e-06	NPBWR2	2832
1.7987	2.09876	3.62906e-07	5.06747e-06	CLEC14A	161198
1.90649	-0.47229	3.72061e-07	5.16996e-06	PCDHB9	56127
3.65767	-2.81382	3.83446e-07	5.29862e-06	T	6862
2.3074	-2.83217	3.8702e-07	5.34061e-06	FGF16	8823
4.15776	-2.45754	4.02572e-07	5.52463e-06	SPATA8	145946
2.11343	-2.75874	4.10208e-07	5.61878e-06	MAT1A	4143
1.82859	2.38749	4.22329e-07	5.76403e-06	IL5RA	3568
2.20432	-3.06026	4.47009e-07	6.06351e-06	HEPACAM	220296
1.78939	0.633989	4.47945e-07	6.06795e-06	ELFN2	114794
3.53669	-2.63075	4.59227e-07	6.20392e-06	ONECUT1	3175
1.88628	0.195713	4.68127e-07	6.31132e-06	CYP4F11	57834
1.5665	5.9753	4.88887e-07	6.56017e-06	IGLL1	3543
1.62614	-2.02795	4.96876e-07	6.64947e-06	RANBP3L	202151
2.25988	-1.62812	5.13002e-07	6.82861e-06	LRFN2	57497
2.3911	-2.57494	5.13946e-07	6.83206e-06	OR10H5	284433
2.10329	-0.956085	5.66424e-07	7.44038e-06	RD3	343035
1.92988	-1.06793	6.42389e-07	8.37205e-06	C1orf173	127254
1.6297	2.16368	6.76163e-07	8.74364e-06	FBLN5	10516
2.43393	-0.117881	7.01512e-07	9.03628e-06	BCL2L14	79370
1.9641	-0.455551	7.28757e-07	9.33895e-06	ADARB2	105
1.77999	0.314897	7.40999e-07	9.47757e-06	HHIP	64399
2.16334	-2.02518	8.32377e-07	1.05115e-05	FOXA3	3171
1.69245	4.32443	8.45581e-07	1.06647e-05	COL5A1	1289
1.63184	0.158746	8.47397e-07	1.06808e-05	KCNIP3	30818
2.35951	-1.97946	8.82798e-07	1.1085e-05	DAB1	1600
1.80349	2.08321	9.24287e-07	1.15333e-05	PTX4	390667
2.69135	-2.47318	1.08503e-06	1.32408e-05	KCNA7	3743
1.5638	-1.82257	1.10614e-06	1.34409e-05	HAS1	3036
2.36958	0.669576	1.14295e-06	1.38375e-05	LGSN	51557
1.71947	2.56388	1.17673e-06	1.42206e-05	H19	283120
1.50222	3.23856	1.18662e-06	1.43054e-05	CPNE7	27132
2.56261	0.107345	1.2263e-06	1.47215e-05	VWA2	340706
2.38085	0.439403	1.26847e-06	1.51729e-05	GPR32	2854
1.66671	-2.66711	1.28401e-06	1.5322e-05	OR2M4	26245
2.33805	-0.00278482	1.30221e-06	1.55114e-05	SHOX2	6474
3.19902	-0.932777	1.69589e-06	1.94792e-05	C2orf54	79919
3.97078	-2.17465	1.77119e-06	2.02625e-05	SOX11	6664
2.77979	-2.35792	1.80048e-06	2.04948e-05	LY6H	4062
1.7996	-2.07566	1.84876e-06	2.09933e-05	TMEM132E	124842
2.0046	-2.69116	2.12122e-06	2.36539e-05	WNT8A	7478
2.62218	-2.13385	2.26754e-06	2.50636e-05	CXorf59	286464
2.99819	-2.49093	2.51112e-06	2.74667e-05	CACNG8	59283
2.63716	-3.06771	2.7375e-06	2.96662e-05	CTXN3	613212
2.05605	3.05562	2.79808e-06	3.02203e-05	UGT2B11	10720
3.33031	-1.06756	2.8604e-06	3.08305e-05	FOXL1	2300
1.59363	-2.28308	3.00635e-06	3.21775e-05	MYBPC2	4606
2.04101	-0.0420591	3.4065e-06	3.58635e-05	EFNB3	1949
2.74555	-2.83013	3.57975e-06	3.73132e-05	CEACAM16	388551
2.32661	-2.43767	3.60891e-06	3.75976e-05	LRRC14B	389257
1.63514	-2.64907	3.61728e-06	3.76404e-05	OR13C4	138804
3.3808	-1.86994	3.72535e-06	3.86692e-05	SLC30A8	169026
2.14679	2.83315	3.7638e-06	3.90276e-05	PTPRD	5789
1.79733	-1.37385	3.80277e-06	3.93254e-05	PCDHB12	56124
2.89951	-3.1396	3.85042e-06	3.97193e-05	OR5P3	120066
1.80305	2.80067	3.8527e-06	3.97223e-05	DUSP27	92235
2.10971	2.73257	3.89932e-06	4.01406e-05	NDST3	9348
1.82317	-1.39414	3.91789e-06	4.02902e-05	MAS1	4142
2.13724	0.105417	3.93417e-06	4.04368e-05	CDK15	65061
1.91985	0.981832	3.94048e-06	4.04619e-05	GXYLT2	727936
1.66524	0.616179	4.15176e-06	4.23458e-05	GREB1	9687
1.85896	-0.928883	4.19777e-06	4.27277e-05	BMPER	168667
1.82059	0.0227549	4.41011e-06	4.46838e-05	GNG4	2786
1.87762	-2.82907	4.47023e-06	4.52239e-05	OR2M3	127062
2.94693	-2.25971	4.50079e-06	4.54869e-05	ERBB4	2066
1.77368	0.877662	4.59756e-06	4.63007e-05	SPSB4	92369
2.07797	-2.09839	4.85309e-06	4.85309e-05	OR10H1	26539
2.56672	2.79044	5.09148e-06	5.06102e-05	ARPP21	10777
1.6622	-0.61393	5.18597e-06	5.13447e-05	CGN	57530
2.00397	2.25905	5.24926e-06	5.18683e-05	ELN	2006
1.73017	-0.852135	5.74408e-06	5.6118e-05	B3GNT3	10331
2.01158	-3.02404	5.85597e-06	5.70993e-05	SLC2A7	155184
1.87285	2.58083	6.21808e-06	6.01594e-05	SLCO5A1	81796
1.57379	-1.33017	7.43079e-06	7.01894e-05	CDSN	1041
1.6927	-1.12169	7.82118e-06	7.34594e-05	PCDHB10	56126
2.52642	-3.02657	7.94063e-06	7.44061e-05	FGF6	2251
2.77664	-2.84326	7.96034e-06	7.45543e-05	SBK2	646643
1.8017	-0.455375	8.26966e-06	7.70187e-05	SHANK2	22941
2.4651	-1.83139	8.38728e-06	7.78596e-05	CRHR2	1395
1.81963	1.75442	9.80629e-06	8.94908e-05	TMEM136	219902
1.76607	1.9774	9.9456e-06	9.04851e-05	AADAT	51166
1.83433	1.31958	1.10733e-05	9.946e-05	CCDC8	83987
1.79195	-1.94169	1.21265e-05	0.000107659	OR52N5	390075
2.77739	3.3964	1.24977e-05	0.000110463	DLK1	8788
2.05531	-1.12221	1.26933e-05	0.000111944	FOLH1	2346
2.32095	0.0351167	1.3446e-05	0.000117593	tAKR	389932
1.87414	-1.82285	1.38517e-05	0.000120771	ANO2	57101
1.59295	0.66539	1.44366e-05	0.000124942	TTLL6	284076
1.9247	3.16589	1.53031e-05	0.000130963	FGD5	152273
2.14542	-2.19251	1.53323e-05	0.000131044	OR4N4	283694
1.64976	0.657591	1.60327e-05	0.000136097	KLHL33	123103
2.00493	-3.21182	1.64023e-05	0.000138821	PHYHIPL	84457
2.60301	-1.8515	1.67268e-05	0.000141028	C6orf138	442213
1.7463	-2.32369	1.75435e-05	0.000147003	ATP12A	479
2.53248	0.435353	1.78991e-05	0.000149647	FAM84A	151354
2.59774	-2.91348	1.81274e-05	0.000151112	GRIN2B	2904
3.37337	-2.08799	1.85948e-05	0.000154556	B3GALT5	10317
2.55626	-3.13257	1.89659e-05	0.000157379	HOXC11	3227
2.66456	0.217131	2.00342e-05	0.000165007	FAM155B	27112
3.0935	-2.90465	2.02425e-05	0.000166266	C1orf87	127795
1.72805	-1.02059	2.43905e-05	0.000194773	WIPF3	644150
1.61731	-1.38836	2.44879e-05	0.000195472	PCDHB16	57717
1.98872	-0.560035	2.5233e-05	0.000200777	PDE1A	5136
2.89099	-3.05364	2.67089e-05	0.000210421	OR5P2	120065
2.2267	-1.50884	2.7334e-05	0.000214583	TMEM196	256130
2.14736	-1.79974	2.73801e-05	0.00021486	ELAVL4	1996
1.5753	2.55979	3.2921e-05	0.000252285	KIAA1217	56243
2.12531	0.805747	3.41445e-05	0.00026036	LOC154822	154822
1.86841	0.0970993	3.50717e-05	0.000266595	MFAP2	4237
2.253	-2.49665	3.74612e-05	0.000281559	ASXL3	80816
1.80577	4.06655	4.46394e-05	0.000327728	UGT3A2	167127
1.58896	0.359986	4.53226e-05	0.000332107	SEZ6L2	26470
2.70049	-1.09792	4.9726e-05	0.000359904	EDN3	1908
1.58162	-1.28236	5.27114e-05	0.0003773	LOC100132354	100132354
2.35783	-2.53198	5.2888e-05	0.000378395	HOXC9	3225
1.9848	-3.27392	5.31012e-05	0.000379376	HEATR7B2	133558
2.54913	-2.78221	5.58665e-05	0.000395514	LOC441601	441601
2.40331	-1.62127	6.01042e-05	0.000421702	CYP2C18	1562
2.91548	-2.95821	6.19209e-05	0.00043254	SP9	100131390
1.53685	-0.93213	6.64157e-05	0.00045904	BCAN	63827
1.65941	-0.0786231	6.65653e-05	0.000459596	CRMP1	1400
1.65638	1.40233	7.52763e-05	0.000511417	VPREB1	7441
2.44914	-2.86034	7.61245e-05	0.000516652	TCEAL7	56849
2.11737	-3.07813	7.92966e-05	0.000535977	SNORD115-26	100033802
1.61835	-3.19851	8.17713e-05	0.000550108	DYDC1	143241
1.99219	0.719269	8.54251e-05	0.000571411	FAM19A5	25817
1.55124	-1.18202	8.89806e-05	0.000592033	PCDHB8	56128
1.85936	-1.92325	9.18967e-05	0.000608575	TNFSF11	8600
2.31935	0.681596	9.28106e-05	0.000613812	AGR2	10551
1.74073	-3.28193	9.61987e-05	0.000631403	FOLH1B	219595
1.90324	-2.18392	9.66347e-05	0.000633848	PRPH	5630
1.77668	1.9283	9.88839e-05	0.000645627	DLGAP2	9228
1.52784	-1.07091	0.000100016	0.000652164	RARRES2	5919
2.5401	-1.83099	0.000107548	0.000696947	CYP2C19	1557
1.77845	0.845563	0.000107858	0.000698726	EMX2OS	196047
2.05263	-3.12703	0.000111683	0.000720696	C5orf38	153571
2.03386	-0.464415	0.000111856	0.000721116	ADAMTS15	170689
2.38766	-1.93541	0.000114398	0.000734888	AZGP1	563
2.85312	0.483884	0.000119173	0.000760417	RASL12	51285
2.03398	-2.40943	0.000136022	0.000848651	RIMS1	22999
1.56968	0.259462	0.000140617	0.000872779	MGAT5B	146664
2.59275	-1.73384	0.000141521	0.000876919	SLC7A3	84889
3.07298	-1.86105	0.0001421	0.000880088	SYT4	6860
1.55011	-3.09888	0.000157236	0.000961046	OR2M2	391194
2.36566	-2.43956	0.000157266	0.000961046	CDH7	1005
2.41163	-2.93537	0.000160921	0.000980376	FRMPD2L1	728798
2.01439	-3.05615	0.000162195	0.000987535	MAPK4	5596
1.67327	0.0687878	0.000164081	0.000997492	DNAH8	1769
1.67136	-2.09942	0.000167808	0.00101693	DUSP26	78986
2.34951	-2.21348	0.000169408	0.00102612	MAGEL2	54551
1.51696	-3.00391	0.000178958	0.00107635	OR2M5	127059
2.25026	-2.35994	0.000185225	0.00110813	OLFM3	118427
1.71663	-2.16888	0.000194796	0.00115671	CAPN13	92291
2.01336	-1.99938	0.000196718	0.00116638	CXorf30	645090
1.77099	0.0539644	0.000224633	0.00130475	KIAA1644	85352
1.90258	-2.61087	0.000229734	0.00132981	DOK5	55816
1.66035	1.39835	0.000235249	0.00135653	AOX2P	344454
1.6139	3.47037	0.000238447	0.0013714	CHRDL1	91851
2.6547	0.474019	0.000256626	0.00145829	EMX2	2018
2.23657	-3.14067	0.000256792	0.00145881	C21orf88	114041
1.90418	-1.92855	0.000257659	0.00146291	B4GALNT1	2583
2.26971	-2.6507	0.000263327	0.00149	LRRC3B	116135
1.59774	-3.19915	0.00026666	0.00150629	PAR4	347745
2.38511	-1.69412	0.000266885	0.00150713	BCHE	590
1.65347	-1.13941	0.000292552	0.00162947	GFRA3	2676
2.28391	-0.24327	0.000300257	0.00166355	LSAMP	4045
2.52676	-2.92775	0.000319311	0.00175449	NPY	4852
1.77814	-0.181101	0.000321867	0.00176659	SLC44A3	126969
1.6867	-1.40355	0.000325667	0.00178489	GRM4	2914
1.59452	-3.14009	0.000326929	0.00178945	C9orf70	84850
2.31489	-1.41558	0.000341026	0.00185441	C6orf141	135398
2.80929	-0.70427	0.000344142	0.00186828	PCDH15	65217
2.14852	-1.32952	0.000346207	0.00187693	CYP27C1	339761
1.68845	1.6655	0.000351957	0.0019019	OLFM4	10562
1.92864	0.275273	0.000375776	0.00200455	LEP	3952
2.16919	-3.03802	0.000382223	0.00203295	TSG1	643432
2.07132	-3.22129	0.000385235	0.00204733	IL3	3562
2.71789	-0.893192	0.000393234	0.00208097	POU1F1	5449
1.63172	5.61251	0.000407452	0.00214041	PXDN	7837
1.8091	-3.09316	0.000422838	0.00220544	MT3	4504
1.60769	-3.11373	0.000425556	0.00221672	TMEM88B	643965
1.97811	-2.84934	0.000426314	0.00221893	CCDC60	160777
1.99092	-2.63063	0.000435209	0.00225593	ASPG	374569
1.90372	-2.36236	0.000472471	0.0024169	UGT3A1	133688
1.60447	-1.86024	0.000511375	0.00258868	CSN1S1	1446
2.36499	-2.61979	0.000562391	0.00280703	XKR4	114786
2.11657	-1.86916	0.000595309	0.00294333	AVP	551
2.39553	-0.772837	0.000623939	0.00305609	NCRNA00200	399706
1.73355	0.655136	0.000658445	0.00319295	OGDHL	55753
1.57085	-1.05307	0.000680788	0.0032758	DSCR6	53820
1.58724	1.07686	0.000681493	0.0032784	ADRA2C	152
1.69925	-3.30426	0.000687322	0.00330087	PCP4	5121
2.01139	-1.73586	0.000688822	0.00330727	KCNIP1	30820
2.28812	-0.19466	0.000690789	0.00331193	ATRNL1	26033
2.11618	-2.16408	0.000709703	0.00339445	LOC339535	339535
1.70807	-0.155985	0.000711242	0.003401	GLP1R	2740
1.83963	-3.17918	0.000732328	0.00348345	OR7A5	26659
1.80512	-3.24307	0.000793539	0.00373364	ADCY8	114
1.6518	-2.53021	0.000845903	0.00394927	DMRTA1	63951
1.51302	-1.79941	0.000909502	0.00420874	LYPD1	116372
2.21051	-2.62612	0.000922308	0.00425812	ST8SIA2	8128
1.73162	-2.74355	0.000927896	0.00428293	HOXC8	3224
2.52139	-2.72429	0.000929533	0.0042885	BARX2	8538
1.83904	-2.88793	0.00098797	0.00450697	MLPH	79083
1.98995	-3.13652	0.00101616	0.00461448	A2BP1	54715
2.48101	-2.45096	0.00103341	0.0046758	NKX2-5	1482
1.58602	-1.18908	0.00107597	0.00482555	GJB2	2706
1.62689	-3.29023	0.00108687	0.0048625	2019-03-11	441061
2.30427	-2.82835	0.00110003	0.00491368	HYAL4	23553
2.1139	-2.59335	0.00113103	0.00502738	FOXI2	399823
1.55093	-2.36009	0.00117474	0.00519384	ECEL1	9427
1.89997	-1.62616	0.00118014	0.00521311	LOC158696	158696
1.58986	-2.67429	0.00121273	0.00533562	RIPK4	54101
1.82055	-0.942669	0.00122864	0.00538795	OR3A2	4995
1.76997	-3.25707	0.0012999	0.00564585	OR5E1P	26343
1.53548	3.70822	0.00132562	0.00574004	DSG2	1829
1.50084	-3.11624	0.00142409	0.00610414	ACCN1	40
1.51454	-1.81183	0.0014256	0.00610926	ESRP1	54845
1.87404	-1.74514	0.00145907	0.0062326	CYP2C9	1559
1.77685	-3.13315	0.00146031	0.00623524	SALL3	27164
1.88877	-2.4264	0.00146798	0.00625996	DPPA2	151871
1.99463	-3.19195	0.00151117	0.00640566	PPP1R3A	5506
1.89191	-3.21805	0.00151598	0.00642342	PTH2	113091
1.54824	-3.31585	0.00155753	0.00656321	HOXC12	3228
1.50336	1.84109	0.00162138	0.00679781	NETO1	81832
1.94666	-3.07674	0.00172939	0.00717373	OR4F5	79501
1.53346	-2.58376	0.00173165	0.00717861	UGT2B10	7365
2.16334	-3.05314	0.00185372	0.00759622	HOXD13	3239
2.27674	-3.01534	0.00186517	0.00763529	CSAG2	728461
1.72125	1.88463	0.00186684	0.00764054	BMP3	651
1.79538	-3.16736	0.0019733	0.00800189	TGM7	116179
1.95541	-3.14111	0.00197961	0.00802304	GPRC6A	222545
1.83365	-3.14681	0.00203842	0.00822131	C1QTNF8	390664
1.74084	-3.27421	0.00209595	0.00840743	OR52E8	390079
1.963	-2.49389	0.00217018	0.0086668	HGC6.3	100128124
1.66835	-1.0348	0.00237212	0.00930737	CREG2	200407
1.753	-2.00144	0.00238276	0.00934177	OR3A1	4994
1.96223	-2.43284	0.00269007	0.0103512	CTNNA2	1496
2.84867	1.78749	0.00279835	0.0106936	PDPN	10630
2.12545	-2.28691	0.00282291	0.0107688	TDRD5	163589
1.61449	-3.26167	0.00288296	0.0109602	GDNF	2668
1.54872	-2.75584	0.00332286	0.0123685	DDX25	29118
1.8437	-2.79889	0.00344769	0.0127474	LOC285194	285194
1.69362	-3.2317	0.00390935	0.0141809	KLHL1	57626
1.75837	-2.75971	0.0039169	0.014198	KCNK3	3777
1.77168	-2.2933	0.00398647	0.0143978	TRIM49L	729384
1.55166	-1.46091	0.00440756	0.0156299	HOXC6	3223
1.61131	-3.03267	0.00477259	0.0166694	CDK5R2	8941
1.54181	3.65753	0.00485267	0.0169076	ROBO1	6091
1.56609	1.6784	0.00488007	0.0169794	COBL	23242
1.59502	0.990155	0.00495813	0.0171999	ADAMTS18	170692
1.64921	-2.42175	0.00541691	0.0185303	OR3A4	390756
1.52606	-0.708253	0.00553388	0.0188786	MMP16	4325
1.55125	1.60652	0.00576841	0.0195516	FGF13	2258
1.59859	-1.06458	0.00595386	0.0200107	GABRA4	2557
1.69219	-2.01543	0.00602409	0.0202087	DMKN	93099
1.82854	-0.304896	0.00607213	0.0203161	C2CD4B	388125
1.64832	-3.11046	0.00621341	0.0207148	CHAT	1103
1.73484	-3.14681	0.0062821	0.0208999	FIBIN	387758
1.99664	-2.58781	0.00651187	0.0214907	NTS	4922
1.54404	-2.62505	0.00700041	0.0228123	PCSK2	5126
1.67441	-1.19348	0.00722581	0.0234306	AJAP1	55966
1.54282	-3.08352	0.00728458	0.0235803	OR2W5	441932
1.88103	-0.470508	0.00767574	0.0245943	GPR110	266977
1.87425	-2.87554	0.00974678	0.0299693	RNASE12	493901
1.55175	-2.1086	0.00981174	0.0301226	TMEFF2	23671
1.52676	-1.22878	0.0116231	0.0347212	CD1B	910
1.59303	-1.75573	0.0131656	0.038459	LOC148145	148145
1.56706	1.80949	0.0134784	0.0391892	IRX1	79192
1.60409	-2.97914	0.0152763	0.0432806	FOXA2	3170
1.68012	2.65591	0.0160829	0.0451587	CDH9	1007

## Sheet: Negatively correlated genes
logFC	logCPM	PValue	FDR	gene	ID
-2.66773	3.43798	6.01623e-28	3.99879e-24	SRGAP1	57522
-3.35234	1.66807	1.11427e-26	5.55463e-23	SPOCK1	6695
-2.63469	2.12899	4.45148e-24	1.69084e-20	CDKN2B	1030
-3.44195	4.79157	8.70473e-24	2.47961e-20	PDK4	5166
-3.851	7.1807	2.4029e-23	5.98922e-20	CD163	9332
-1.57062	6.62186	3.12168e-23	6.91625e-20	S100A6	6277
-1.64819	8.70822	4.79446e-23	9.56015e-20	C10orf54	64115
-4.34932	1.99209	5.56733e-23	1.00921e-19	SDC2	6383
-5.10376	3.3383	3.71163e-22	5.69307e-19	IL1R2	7850
-2.08736	5.76035	5.58367e-21	6.54932e-18	PTAFR	5724
-1.56057	7.27812	6.7176e-21	7.4416e-18	ACSL1	2180
-1.8908	7.02456	8.02896e-21	8.42618e-18	TLR4	7099
-1.73264	7.17743	1.08017e-20	1.00542e-17	NAMPT	10135
-2.97455	1.47286	1.10929e-20	1.00542e-17	SYT17	51760
-4.60086	1.95831	2.28711e-20	1.98282e-17	WNK3	65267
-3.35488	1.26109	2.59895e-20	2.15929e-17	ADAMDEC1	27299
-3.47691	4.20052	4.34029e-20	3.32867e-17	EPB41L3	23136
-2.61481	2.87731	5.78055e-20	4.0121e-17	KCNE1	3753
-1.53098	6.26421	5.83505e-20	4.0121e-17	C1orf162	128346
-1.81534	4.57968	6.83966e-20	4.39944e-17	VDR	7421
-2.06939	1.81772	1.91995e-19	1.19637e-16	AIM2	9447
-2.33952	4.61736	2.00498e-19	1.21149e-16	CPM	1368
-3.12953	2.37296	5.09911e-19	2.90503e-16	CADM1	23705
-2.1133	5.02264	5.91875e-19	3.27377e-16	LGALS3	3958
-1.70246	5.19004	6.0747e-19	3.27377e-16	PILRA	29992
-1.66033	4.62131	6.63584e-19	3.48207e-16	MPP7	143098
-8.46353	2.34869	7.36739e-19	3.76681e-16	SLC10A2	6555
-3.16891	1.83664	2.14649e-18	9.95373e-16	SMPDL3A	10924
-1.75232	3.8016	2.6466e-18	1.16024e-15	UPP1	7378
-1.67516	6.30412	2.67658e-18	1.16024e-15	BCL6	604
-2.2295	4.47601	1.1213e-17	4.28025e-15	CD300LB	124599
-1.77398	7.52562	1.44428e-17	5.23616e-15	ITGAM	3684
-3.1887	4.82274	1.71883e-17	6.01288e-15	C2	717
-2.56568	6.60326	3.13029e-17	1.05793e-14	FCGR3A	2214
-2.10207	3.28564	3.23347e-17	1.07459e-14	ZNF503	84858
-2.15042	3.95691	5.57979e-17	1.71171e-14	CTSL1	1514
-4.47229	4.44794	7.69911e-17	2.29135e-14	TKTL1	8277
-1.52211	5.9143	8.36083e-17	2.41616e-14	TNFSF10	8743
-1.98089	6.15889	1.05716e-16	2.92774e-14	TYMP	1890
-2.56544	6.32572	1.28353e-16	3.50598e-14	HK3	3101
-2.1403	5.01833	1.4075e-16	3.79264e-14	HMOX1	3162
-1.6374	2.42679	1.52608e-16	4.05734e-14	SLC46A2	57864
-2.2372	4.57621	1.74915e-16	4.58922e-14	CRISPLD2	83716
-5.24602	1.82094	1.92554e-16	4.80094e-14	CDH6	1004
-2.49354	4.33818	1.92615e-16	4.80094e-14	LDLRAD3	143458
-2.04901	1.00519	2.07456e-16	5.04472e-14	CFB	629
-1.88392	6.25555	2.92655e-16	7.03077e-14	MS4A7	58475
-2.01174	3.77322	5.02523e-16	1.15176e-13	HSPA6	3310
-2.27614	7.25256	5.29335e-16	1.19567e-13	CX3CR1	1524
-2.29921	4.59599	5.77475e-16	1.27943e-13	SLC8A1	6546
-1.91448	7.70254	5.99905e-16	1.30023e-13	FGR	2268
-2.05336	0.486847	7.36433e-16	1.56218e-13	GNA14	9630
-1.9114	3.93281	7.49579e-16	1.57333e-13	NPL	80896
-3.27407	3.74676	9.11509e-16	1.85464e-13	MSR1	4481
-2.12659	6.06654	9.63024e-16	1.93667e-13	FAM198B	51313
-2.38771	1.63094	9.71278e-16	1.93667e-13	C6orf97	80129
-1.72673	6.89114	1.36513e-15	2.56798e-13	FCER1G	2207
-2.1235	5.53021	1.62914e-15	2.93565e-13	LILRB3	11025
-2.66445	10.2687	2.44351e-15	4.18384e-13	VCAN	1462
-2.06603	5.89632	2.45491e-15	4.18384e-13	RBM47	54502
-1.81167	7.17074	3.51894e-15	5.89644e-13	NCF2	4688
-2.0478	7.64154	3.88219e-15	6.29357e-13	FGL2	10875
-2.01576	3.85132	9.89828e-15	1.43023e-12	ITGA7	3679
-2.93913	4.66908	1.06707e-14	1.51981e-12	C1QA	712
-2.41811	3.93031	1.13599e-14	1.5741e-12	HSPA7	3311
-1.68247	6.88168	1.35724e-14	1.86644e-12	FCGR2A	2212
-3.28748	2.45608	1.42669e-14	1.94851e-12	DAAM2	23500
-1.84121	5.46545	2.17318e-14	2.81385e-12	CSTA	1475
-1.88886	4.03156	2.49821e-14	3.19323e-12	TREM1	54210
-2.07239	4.43252	2.56787e-14	3.26136e-12	FBP1	2203
-2.18417	4.27692	2.74236e-14	3.46093e-12	FCGR2C	9103
-1.85947	5.6612	3.13462e-14	3.90652e-12	CCR1	1230
-2.02229	12.6139	3.6639e-14	4.48209e-12	LYZ	4069
-2.90171	2.58412	4.11742e-14	4.88698e-12	C17orf55	284185
-2.87274	0.945802	4.34887e-14	5.09476e-12	ADAMTS5	11096
-3.84743	1.47669	4.36913e-14	5.09476e-12	ONECUT2	9480
-2.61987	4.78755	5.03119e-14	5.83267e-12	AQP9	366
-2.34898	3.36947	5.11214e-14	5.87757e-12	SERINC2	347735
-1.71608	6.40974	5.12887e-14	5.87757e-12	SIRPB1	10326
-2.19337	8.0131	6.02042e-14	6.78233e-12	SERPINA1	5265
-2.40173	6.07032	6.4712e-14	7.16866e-12	MAFB	9935
-2.75735	2.04796	6.71406e-14	7.39659e-12	C10orf72	196740
-2.86743	2.88835	8.3816e-14	9.01857e-12	RTN1	6252
-2.06813	3.32988	8.62015e-14	9.19175e-12	SIGLEC7	27036
-1.87442	4.92736	8.86252e-14	9.39993e-12	MS4A14	84689
-4.18158	-2.30402	8.98733e-14	9.48187e-12	SEL1L2	80343
-1.65825	6.78121	9.43152e-14	9.79502e-12	SCPEP1	59342
-4.74221	-0.0397356	1.89964e-13	1.7885e-11	OLAH	55301
-1.76284	1.67166	2.16055e-13	2.0226e-11	NHS	4810
-1.81223	4.56585	2.30109e-13	2.10476e-11	ADAP2	55803
-1.55766	3.71412	2.41039e-13	2.18469e-11	CAMK1	8536
-1.93664	7.57364	2.44475e-13	2.20581e-11	IFI30	10437
-1.80691	1.63961	2.59589e-13	2.32117e-11	SLED1	643036
-2.00358	-0.173726	2.66495e-13	2.37228e-11	SHISA4	149345
-1.64648	7.02497	3.12753e-13	2.75942e-11	LMNA	4000
-1.77857	4.80802	4.07265e-13	3.51553e-11	LILRA1	11024
-1.71337	4.28994	4.32482e-13	3.70116e-11	CD300C	10871
-4.48427	-0.849575	4.45637e-13	3.78127e-11	C7orf16	10842
-2.71391	-0.463354	5.01979e-13	4.18806e-11	C4orf49	84709
-3.53207	2.55286	5.12986e-13	4.24437e-11	MMP7	4316
-1.82946	5.77396	5.32649e-13	4.37079e-11	LRRC25	126364
-2.20754	5.50304	5.48177e-13	4.47978e-11	LILRA6	79168
-2.23979	6.33817	6.44624e-13	5.16217e-11	C5AR1	728
-2.16724	2.40342	7.27019e-13	5.72994e-11	CDC42EP1	11135
-2.40844	2.35393	8.85916e-13	6.90045e-11	HTR7	3363
-2.34039	5.92273	1.0291e-12	7.77284e-11	TLR8	51311
-3.23807	0.752316	1.16548e-12	8.57554e-11	MYO16	23026
-2.41031	1.36711	1.30056e-12	9.53428e-11	ABLIM3	22885
-1.94583	6.53339	1.31926e-12	9.63595e-11	SORT1	6272
-2.35302	1.17986	1.57454e-12	1.12936e-10	FEZ1	9638
-2.00155	2.43864	1.69584e-12	1.20768e-10	STEAP4	79689
-1.53237	-0.618243	1.79575e-12	1.27428e-10	SLC12A8	84561
-1.59417	2.73991	2.01576e-12	1.41033e-10	ARHGAP24	83478
-2.11951	2.50523	2.13275e-12	1.48218e-10	PLA2G16	11145
-2.48943	-0.240535	2.34961e-12	1.59049e-10	COPZ2	51226
-2.49648	2.56219	3.03867e-12	1.99313e-10	CCL23	6368
-2.46606	7.20292	3.58111e-12	2.28138e-10	THBS1	7057
-1.6329	4.98703	3.69681e-12	2.34014e-10	CREB5	9586
-2.00841	6.38736	3.78163e-12	2.37873e-10	SLC11A1	6556
-3.8195	2.704	3.91947e-12	2.45768e-10	ALOX15B	247
-1.89876	-0.568236	4.08437e-12	2.54507e-10	PHLDA2	7262
-6.85592	-0.983334	4.19188e-12	2.60393e-10	HMX2	3167
-2.40421	4.6648	4.32942e-12	2.67271e-10	TMEM176B	28959
-1.89914	3.95605	4.38816e-12	2.70061e-10	TLR5	7100
-1.6999	3.92298	5.27869e-12	3.20906e-10	C17orf87	388325
-2.13877	0.824897	5.60516e-12	3.35636e-10	SIRPD	128646
-7.71266	-0.451822	7.06648e-12	4.15651e-10	NPY2R	4887
-2.3596	-0.909942	7.17544e-12	4.20527e-10	LAMA2	3908
-2.93152	-0.0654732	8.52286e-12	4.91173e-10	ANKRD34B	340120
-2.34559	3.71604	9.02944e-12	5.17549e-10	TMEM176A	55365
-1.73832	2.37688	9.03244e-12	5.17549e-10	LY96	23643
-1.90788	6.36895	9.58159e-12	5.46927e-10	LILRB2	10288
-6.11532	-0.703753	1.03275e-11	5.80086e-10	PAX2	5076
-2.14664	5.44889	1.06339e-11	5.95617e-10	FPR1	2357
-2.13113	1.13268	1.07293e-11	5.99279e-10	UNC5A	90249
-2.25118	1.81372	1.25949e-11	6.99562e-10	MAOA	4128
-1.52164	5.53447	1.56708e-11	8.46815e-10	FGD4	121512
-2.55399	-0.369322	1.60404e-11	8.598e-10	CASP5	838
-1.7859	4.41455	1.85831e-11	9.66472e-10	IL1RN	3557
-2.63877	4.64624	2.11412e-11	1.08648e-09	C1QB	713
-1.65841	7.99002	2.34203e-11	1.19744e-09	CD36	948
-1.54543	5.06922	2.59301e-11	1.3032e-09	NOD2	64127
-2.07205	7.46227	2.67833e-11	1.34186e-09	FCN1	2219
-2.20523	1.42523	2.90809e-11	1.44238e-09	KCNJ2	3759
-2.01038	4.17129	3.13261e-11	1.52724e-09	HNMT	3176
-3.21438	-0.155412	3.19923e-11	1.55213e-09	POF1B	79983
-1.78889	5.64893	3.48602e-11	1.68308e-09	CHST15	51363
-1.514	8.69034	3.76348e-11	1.79961e-09	RNASE2	6036
-2.90947	0.916674	3.85299e-11	1.83362e-09	OSBPL6	114880
-1.87523	4.92664	4.01167e-11	1.88975e-09	NLRP12	91662
-1.76841	4.87038	4.25603e-11	1.97821e-09	SGMS2	166929
-1.65479	5.37177	4.31801e-11	2.00099e-09	LILRB1	10859
-2.95001	-1.14575	4.32511e-11	2.00099e-09	C1QL1	10882
-2.10442	1.45307	4.45251e-11	2.04569e-09	PID1	55022
-4.33999	-1.85332	4.90978e-11	2.2403e-09	PROX1	5629
-2.526	1.65169	4.98404e-11	2.25868e-09	COL6A6	131873
-2.19268	-0.543335	5.62859e-11	2.52211e-09	HPD	3242
-3.39208	-0.589534	6.21673e-11	2.72443e-09	CTSL2	1515
-1.76279	3.89849	6.91745e-11	2.98559e-09	CXCL16	58191
-1.67982	5.32168	7.76351e-11	3.29371e-09	CD86	942
-2.00451	3.99374	9.34962e-11	3.80472e-09	MS4A4A	51338
-3.39709	2.32661	1.01301e-10	4.08067e-09	PHACTR3	116154
-1.50091	1.51249	1.05053e-10	4.21169e-09	SIGLEC16	400709
-1.59028	4.33283	1.24656e-10	4.89299e-09	SLC37A2	219855
-3.88396	0.294175	1.51592e-10	5.83543e-09	EPHA3	2042
-2.24146	0.512309	1.87535e-10	7.05557e-09	C1orf95	375057
-6.27846	-1.05129	1.91093e-10	7.17589e-09	HMX3	340784
-3.35361	0.285433	2.09488e-10	7.80783e-09	HBE1	3046
-1.84427	4.81738	2.23763e-10	8.29338e-09	CD1D	912
-1.70187	0.859969	2.35927e-10	8.69571e-09	MARVELD2	153562
-2.52413	3.64984	2.47169e-10	9.04321e-09	LILRA3	11026
-1.80566	5.11927	3.06918e-10	1.0948e-08	VNN2	8875
-3.08503	-1.96741	3.09397e-10	1.10167e-08	CASR	846
-2.64657	0.143205	3.22189e-10	1.13909e-08	DNAJC5B	85479
-2.32008	2.43295	3.40061e-10	1.19113e-08	CCDC3	83643
-1.7847	0.892389	3.64957e-10	1.25863e-08	PNPLA1	285848
-6.88672	-0.267593	3.79255e-10	1.30385e-08	EPHA5	2044
-1.59055	3.42581	4.06101e-10	1.38185e-08	TICAM2	353376
-2.00124	0.198299	4.37115e-10	1.48232e-08	ELOVL3	83401
-1.75931	6.14083	4.48131e-10	1.51453e-08	NCF1	653361
-1.89245	2.78283	4.73728e-10	1.59026e-08	ABCC3	8714
-6.13712	1.35582	5.8932e-10	1.93912e-08	FOXF2	2295
-1.51338	3.00751	6.03191e-10	1.97174e-08	IER3	8870
-1.88532	4.24693	6.38583e-10	2.06375e-08	SECTM1	6398
-2.07071	2.11073	6.58035e-10	2.11974e-08	VNN3	55350
-2.01887	0.980634	6.91487e-10	2.21676e-08	ARHGAP29	9411
-5.72342	-0.632872	7.15755e-10	2.28354e-08	COL20A1	57642
-2.02512	-1.82243	7.76452e-10	2.44203e-08	GUCY2C	2984
-3.42239	1.22703	8.20205e-10	2.55945e-08	UNC5C	8633
-1.82284	4.03683	8.80449e-10	2.7346e-08	APOBEC3A	200315
-2.20817	-1.58049	1.14533e-09	3.47607e-08	C16orf73	254528
-1.54027	6.21268	1.1614e-09	3.5195e-08	TP53INP2	58476
-1.5642	8.87341	1.2166e-09	3.65897e-08	CYBB	1536
-2.31693	4.06003	1.41461e-09	4.1468e-08	C1QC	714
-5.52959	-2.00271	1.41603e-09	4.1468e-08	GABRG2	2566
-1.53743	4.89653	1.44737e-09	4.21938e-08	NCF1B	654816
-1.76155	2.1731	1.46147e-09	4.24215e-08	TBC1D12	23232
-1.65503	7.43972	1.50449e-09	4.34776e-08	KCTD12	115207
-2.60848	-1.48613	1.56637e-09	4.52003e-08	CH25H	9023
-1.51115	-2.11226	1.61757e-09	4.63425e-08	ANXA2P3	305
-3.15797	0.411881	1.62371e-09	4.63695e-08	MAOB	4129
-3.64151	0.518381	1.63033e-09	4.63695e-08	COL11A1	1301
-1.86039	-0.44042	1.67119e-09	4.72674e-08	RGL3	57139
-2.44354	1.38822	1.70352e-09	4.81135e-08	HOXB7	3217
-2.37568	-0.210569	1.87073e-09	5.23909e-08	HES4	57801
-1.51246	6.43445	2.22044e-09	6.06515e-08	KLF4	9314
-2.1167	4.57029	2.26655e-09	6.17418e-08	LILRA5	353514
-2.07096	4.55748	2.27704e-09	6.17745e-08	SERPINB2	5055
-1.75983	4.21128	2.28556e-09	6.19212e-08	CDA	978
-1.84448	2.53484	2.32872e-09	6.29197e-08	RNASE1	6035
-2.44538	1.85421	2.38971e-09	6.44802e-08	TMEM105	284186
-1.81052	1.30032	2.65965e-09	7.08055e-08	C3	718
-2.09564	0.983552	3.19839e-09	8.34762e-08	TMTC1	83857
-1.73859	5.47957	3.55735e-09	9.22413e-08	FN1	2335
-2.74154	1.9117	3.69664e-09	9.52337e-08	RPH3A	22895
-2.99038	1.17709	3.81727e-09	9.75852e-08	RNF182	221687
-1.91838	3.28151	3.92981e-09	1.00077e-07	KCNC3	3748
-1.8582	4.8499	4.08027e-09	1.03512e-07	CYP1B1	1545
-1.63819	0.95574	4.46282e-09	1.12218e-07	RAB39	54734
-4.6987	-2.5232	5.26395e-09	1.29388e-07	MAGEA1	4100
-1.53876	2.43947	5.5603e-09	1.35375e-07	ODF3B	440836
-1.63559	6.55244	5.9327e-09	1.43277e-07	CR1	1378
-1.62308	4.17415	5.99573e-09	1.44565e-07	SLC15A3	51296
-1.7615	3.77763	6.17286e-09	1.47409e-07	FPR2	2358
-2.13264	0.400469	6.38821e-09	1.52006e-07	NCAM2	4685
-2.79722	-1.56255	6.763e-09	1.5978e-07	VIT	5212
-2.04966	-0.327464	6.93548e-09	1.63467e-07	ADRA1D	146
-1.91163	2.55818	7.30495e-09	1.70363e-07	EMR3	84658
-2.5014	-0.994787	9.48755e-09	2.14979e-07	CCDC144NL	339184
-5.364	-1.76033	9.53505e-09	2.1581e-07	HCN1	348980
-2.34524	-2.52127	9.94723e-09	2.23113e-07	MYBPHL	343263
-1.77719	4.96242	1.00578e-08	2.2534e-07	MEFV	4210
-1.89957	2.69114	1.02357e-08	2.28556e-07	ASGR2	433
-2.17941	5.45055	1.04279e-08	2.32066e-07	S100A12	6283
-2.26509	-1.84729	1.05254e-08	2.33507e-07	VMO1	284013
-1.92097	3.33356	1.05277e-08	2.33507e-07	MYO7A	4647
-1.81982	5.47133	1.06295e-08	2.34747e-07	MYOF	26509
-1.51743	3.48543	1.09279e-08	2.39396e-07	CLEC4A	50856
-2.36228	3.7235	1.12133e-08	2.44631e-07	CD300E	342510
-2.64368	-2.05088	1.25414e-08	2.68034e-07	OXGR1	27199
-2.29404	-1.53504	1.27372e-08	2.71636e-07	CYP19A1	1588
-2.26366	-2.11993	1.33155e-08	2.82458e-07	C17orf77	146723
-2.3715	-0.545356	1.47735e-08	3.1107e-07	WSCD1	23302
-1.68775	5.83886	1.51559e-08	3.17447e-07	LRRK2	120892
-2.50947	1.06	1.52485e-08	3.1905e-07	IL31RA	133396
-1.62414	-1.75325	1.57676e-08	3.27849e-07	C2orf58	285154
-2.60575	0.621594	1.65445e-08	3.42573e-07	KAL1	3730
-2.80007	-0.837087	1.69927e-08	3.50398e-07	THSD4	79875
-1.64101	5.98046	1.91526e-08	3.90494e-07	SLC7A7	9056
-2.11963	3.39601	1.92465e-08	3.92007e-07	CYP27A1	1593
-1.98754	2.09891	1.93066e-08	3.92831e-07	GLDN	342035
-2.89198	4.83997	1.94609e-08	3.95566e-07	CES1	1066
-1.52108	4.86629	2.2815e-08	4.56758e-07	PADI2	11240
-2.06125	-0.513421	2.34343e-08	4.67747e-07	LRRC7	57554
-3.74402	-2.44544	2.35945e-08	4.70005e-07	FAM135B	51059
-2.85785	-1.02859	2.42182e-08	4.81467e-07	COL21A1	81578
-2.76986	-0.158542	2.76642e-08	5.3817e-07	CDO1	1036
-2.03481	1.53007	2.78585e-08	5.41421e-07	LYVE1	10894
-2.5659	2.68014	3.10655e-08	5.93909e-07	MARCO	8685
-3.99285	-2.28311	3.34381e-08	6.31397e-07	GPR37	2861
-1.5214	4.30981	3.49142e-08	6.53086e-07	F5	2153
-4.66981	-1.83091	3.79455e-08	7.05157e-07	C10orf82	143379
-4.58696	-2.31735	4.17969e-08	7.65316e-07	NOS1	4842
-2.74532	-1.6973	4.24655e-08	7.76847e-07	HRC	3270
-1.65986	4.00819	4.69007e-08	8.47869e-07	METTL7B	196410
-1.70678	4.33089	4.80449e-08	8.63076e-07	KIAA1598	57698
-2.24182	-0.59417	4.81993e-08	8.65071e-07	LPAR3	23566
-1.58441	4.28805	4.88769e-08	8.75656e-07	SIGLEC9	27180
-1.53475	1.64578	6.54102e-08	1.136e-06	MCOLN2	255231
-1.62595	1.29763	6.54593e-08	1.136e-06	SIGLEC11	114132
-2.85137	-1.10781	6.91445e-08	1.19579e-06	SULT4A1	25830
-3.31033	-1.62487	7.72905e-08	1.32745e-06	KRT79	338785
-1.72215	-0.226054	7.92649e-08	1.35447e-06	ANKRD57	65124
-1.92901	5.29203	8.92113e-08	1.50752e-06	LILRB4	11006
-1.67093	3.73565	9.75187e-08	1.63405e-06	RYR3	6263
-1.82301	-0.691438	9.82012e-08	1.64273e-06	NTNG1	22854
-1.79959	-0.518591	1.02312e-07	1.70434e-06	ZMYND15	84225
-1.76577	8.52823	1.04358e-07	1.72975e-06	S100A8	6279
-1.66318	0.378018	1.09497e-07	1.80742e-06	OR52K2	119774
-4.51521	-1.9859	1.11555e-07	1.83684e-06	CTAG2	30848
-2.14156	-1.3605	1.16682e-07	1.9102e-06	B3GALT1	8708
-1.60383	3.54066	1.21315e-07	1.9715e-06	SDC3	9672
-1.54572	-0.30527	1.24328e-07	2.0139e-06	PVRL4	81607
-2.81844	1.77015	1.25266e-07	2.02743e-06	COL29A1	256076
-3.624	-2.69267	1.31244e-07	2.11048e-06	HMSD	284293
-5.6336	-0.85443	1.32368e-07	2.12684e-06	FOXQ1	94234
-1.75918	3.45885	1.33269e-07	2.1396e-06	GSTM3	2947
-1.76077	0.0496969	1.42785e-07	2.25605e-06	LIPN	643418
-1.58121	8.34809	1.5961e-07	2.4947e-06	LRP1	4035
-1.79809	6.45617	1.69189e-07	2.61725e-06	CD14	929
-1.92109	-1.06408	1.69937e-07	2.62475e-06	GPR25	2848
-2.60794	-0.893401	1.7776e-07	2.73077e-06	ROR1	4919
-2.27506	3.18573	1.90951e-07	2.90875e-06	PPARGC1A	10891
-1.51349	4.51541	1.94637e-07	2.95168e-06	NCF1C	654817
-1.53732	1.87571	2.09561e-07	3.13948e-06	FFAR2	2867
-1.7664	2.02702	2.16237e-07	3.22014e-06	SORCS2	57537
-3.21182	-2.92264	2.31968e-07	3.4288e-06	CELA2A	63036
-2.29778	4.37942	2.40712e-07	3.53446e-06	ADAMTS2	9509
-3.03207	-1.50132	2.43833e-07	3.56978e-06	ST6GALNAC5	81849
-1.52962	5.43842	2.48825e-07	3.63219e-06	CLEC7A	64581
-4.81039	-1.54035	2.58506e-07	3.74807e-06	SLC5A12	159963
-2.01203	-2.34042	2.95268e-07	4.21449e-06	PRND	23627
-4.35446	-2.1966	3.37203e-07	4.75182e-06	GABRA1	2554
-1.7194	9.12118	3.45191e-07	4.8541e-06	S100A9	6280
-1.57065	1.67536	3.52622e-07	4.94117e-06	ITGA1	3672
-4.21752	-2.34497	3.615e-07	5.05491e-06	LPPR1	54886
-2.74324	-1.04271	3.65148e-07	5.0952e-06	GATA5	140628
-1.52173	-1.35362	3.85558e-07	5.32412e-06	ULBP1	80329
-2.53998	1.15677	3.9364e-07	5.41697e-06	PTGIS	5740
-1.5409	8.8372	4.42959e-07	6.02496e-06	MPEG1	219972
-1.62471	0.389081	4.81076e-07	6.46406e-06	CD163L1	283316
-1.93431	-0.493748	5.19751e-07	6.90002e-06	COL25A1	84570
-1.77955	4.68507	5.20554e-07	6.90608e-06	SCUBE1	80274
-1.6671	1.62855	5.49905e-07	7.27128e-06	PAPPA	5069
-2.41772	-2.76847	5.62787e-07	7.41214e-06	KRT7	3855
-3.77449	-2.51127	5.82923e-07	7.65206e-06	KIAA1210	57481
-3.74988	-1.41752	6.21637e-07	8.1122e-06	LOC84856	84856
-1.67497	-1.77602	6.85904e-07	8.85238e-06	CCDC151	115948
-1.97024	-2.02194	7.27746e-07	9.33199e-06	CLEC6A	93978
-1.96727	0.643045	7.33256e-07	9.39058e-06	PLA2G7	7941
-2.71605	-1.82699	7.59718e-07	9.67972e-06	HS6ST3	266722
-1.76447	1.24927	7.66602e-07	9.75498e-06	KCNJ15	3772
-1.90295	1.10909	8.02132e-07	1.01811e-05	IL10	3586
-3.3587	-2.07544	8.2099e-07	1.0394e-05	FLJ16779	100192386
-1.77129	1.07036	8.28381e-07	1.04676e-05	SLC6A12	6539
-3.7813	-2.24436	8.55167e-07	1.07652e-05	MT1H	4496
-2.30242	-0.053472	8.75251e-07	1.10041e-05	TRPV4	59341
-1.57875	1.17489	9.00875e-07	1.12836e-05	FOLR2	2350
-1.58715	3.50288	9.23059e-07	1.15311e-05	EMR4P	326342
-1.92053	-0.339877	9.2353e-07	1.15311e-05	NTN4	59277
-1.86884	2.96109	9.25606e-07	1.15426e-05	FCGR3B	2215
-2.97862	-3.09818	1.02021e-06	1.25264e-05	TCF23	150921
-2.93228	-1.8993	1.17746e-06	1.42208e-05	CFHR3	10878
-2.02413	-2.88055	1.18237e-06	1.42715e-05	NECAB2	54550
-2.15186	-2.75381	1.41326e-06	1.66354e-05	LOC100128023	100128023
-1.74431	1.8838	1.45445e-06	1.70398e-05	THRB	7068
-2.40039	1.62279	1.67148e-06	1.92543e-05	OTOF	9381
-3.19899	-2.88314	1.6773e-06	1.93103e-05	CELA2B	51032
-1.51231	0.958069	1.71905e-06	1.97113e-05	MT1E	4493
-2.58771	-1.09802	1.8537e-06	2.10375e-05	TGM3	7053
-4.09017	-2.07614	1.94683e-06	2.19445e-05	ADAMTS19	171019
-1.80043	1.93397	1.96124e-06	2.2057e-05	PEG10	23089
-1.9362	-2.50639	2.09828e-06	2.34528e-05	TWIST2	117581
-2.15419	2.02107	2.2036e-06	2.44382e-05	PTGFR	5737
-2.24779	-0.912249	2.32368e-06	2.56132e-05	LOC152225	152225
-1.94962	-2.03705	2.34961e-06	2.58703e-05	PCSK9	255738
-1.61469	0.924857	2.58383e-06	2.81847e-05	CLEC4G	339390
-1.57532	-1.91979	2.64598e-06	2.87839e-05	ENTPD2	954
-1.5194	0.912602	2.83026e-06	3.05222e-05	LONRF2	164832
-1.7198	0.33978	2.9199e-06	3.14038e-05	WWC1	23286
-2.59732	-1.7092	3.05285e-06	3.25703e-05	CHST8	64377
-2.84384	-2.9164	3.44387e-06	3.61086e-05	LOC153910	153910
-2.7283	-2.94929	3.52287e-06	3.68036e-05	ARSF	416
-4.07051	-2.13519	3.82194e-06	3.94459e-05	DBX2	440097
-2.25563	-1.98805	3.9427e-06	4.04619e-05	ACE2	59272
-1.55974	1.82621	4.36186e-06	4.42623e-05	NCKAP1	10787
-1.50022	-1.26518	4.58854e-06	4.62566e-05	OR52K1	390036
-2.71477	-2.241	4.73978e-06	4.75169e-05	BDKRB2	624
-2.19749	-1.04007	4.83737e-06	4.83979e-05	KCNT2	343450
-1.54613	-1.59308	5.18253e-06	5.13361e-05	C1orf61	10485
-3.29055	-2.63173	5.25332e-06	5.18827e-05	MAGEC3	139081
-2.08487	-0.308081	5.56528e-06	5.4639e-05	TACC2	10579
-1.68211	0.259585	5.61446e-06	5.49864e-05	RBP7	116362
-1.90146	1.2371	5.84742e-06	5.70438e-05	DKK2	27123
-1.88294	-1.27437	6.40215e-06	6.17007e-05	ITLN1	55600
-3.3215	-2.93457	6.56631e-06	6.30391e-05	MAGEC1	9947
-1.57812	-0.111001	7.10522e-06	6.76914e-05	CGNL1	84952
-1.74172	-1.91751	7.17183e-06	6.82934e-05	KLF15	28999
-2.06812	-1.97902	7.38341e-06	6.98412e-05	CPNE4	131034
-3.23931	-2.471	8.1485e-06	7.61036e-05	GPR158	57512
-2.7832	-3.13529	8.28357e-06	7.70762e-05	CGA	1081
-2.71201	-2.34653	8.59793e-06	7.96297e-05	PTCHD3	374308
-1.50691	0.232355	8.86674e-06	8.18153e-05	EDNRB	1910
-1.50462	1.85194	9.18868e-06	8.45511e-05	G0S2	50486
-2.69217	-2.89661	9.33119e-06	8.56179e-05	EN2	2020
-2.12586	-2.5652	9.92125e-06	9.04158e-05	SAG	6295
-1.63481	-1.16143	1.14756e-05	0.000102474	C1orf161	126868
-3.15352	-2.81573	1.2481e-05	0.000110364	PRDM14	63978
-1.53855	-1.20885	1.28041e-05	0.000112721	PTGES	9536
-1.99927	-2.68263	1.30633e-05	0.000114801	MYBPC1	4604
-1.77573	-3.06805	1.33991e-05	0.000117337	TREML2P1	221438
-1.58201	4.20855	1.37124e-05	0.000119661	ARHGEF10L	55160
-1.53126	-1.35258	1.45328e-05	0.000125611	MMEL1	79258
-1.81635	-0.913972	1.45633e-05	0.000125765	C6orf223	221416
-2.13157	-2.18085	1.47367e-05	0.000126988	CARD17	440068
-1.73818	0.638344	1.79564e-05	0.000149937	PRKCDBP	112464
-3.20589	-1.19602	1.879e-05	0.000156113	HPSE2	60495
-1.69279	0.79875	1.94871e-05	0.0001611	FOLR3	2352
-1.68182	-3.1445	1.9795e-05	0.000163374	CD300LD	100131439
-2.95632	-2.18308	1.99784e-05	0.000164683	ONECUT3	390874
-2.07591	-3.11258	2.09574e-05	0.000171407	BARX1	56033
-3.1125	-0.868981	2.17477e-05	0.000176928	TRDN	10345
-1.94723	-2.50662	2.20667e-05	0.000179084	LPPR4	9890
-3.16659	-2.86111	2.37134e-05	0.000190433	CXorf64	100130613
-2.61458	0.456625	2.40624e-05	0.000192847	C11orf41	25758
-2.4373	-3.15938	2.6496e-05	0.000209157	REG1A	5967
-2.8468	-2.86899	2.75372e-05	0.000215753	EFNA2	1943
-3.12162	-2.95765	2.79548e-05	0.000218853	HTR2C	3358
-2.66195	-2.38972	2.85361e-05	0.000223141	PSORS1C2	170680
-1.86753	3.92025	2.88493e-05	0.000225148	APOC2	344
-3.22363	-2.85428	2.88936e-05	0.000225407	DCAF4L2	138009
-1.912	0.615949	3.15901e-05	0.000243489	MAGI1	9223
-2.01	-3.21709	3.28101e-05	0.000251531	HS3ST6	64711
-2.10938	-2.7061	3.32356e-05	0.000254012	SPATA16	83893
-1.55072	-1.06668	3.43791e-05	0.000261849	ACCN4	55515
-2.31549	-2.36909	3.60179e-05	0.00027256	EPS8L3	79574
-2.03991	-1.85764	3.65118e-05	0.000275566	L1TD1	54596
-1.74911	2.61867	3.75752e-05	0.000282309	LGALS2	3957
-2.71056	-2.71836	3.78005e-05	0.000283895	C20orf114	92747
-1.79964	3.28144	4.06365e-05	0.000302348	HOXB5	3215
-3.10619	-2.77088	4.23184e-05	0.000313575	PTPRZ1	5803
-2.02991	-0.380431	4.28609e-05	0.000317005	HBBP1	3044
-2.37211	-3.09762	4.77336e-05	0.000347883	ST8SIA3	51046
-3.02323	2.02691	4.97806e-05	0.000360169	SAGE1	55511
-2.17336	-0.682211	5.15228e-05	0.000370488	CES4	51716
-1.61852	2.99696	5.22507e-05	0.000374642	DTNA	1837
-1.91278	0.105899	5.29418e-05	0.000378508	NEBL	10529
-1.85643	-1.57507	5.63498e-05	0.000398163	LRIG3	121227
-2.72761	-1.09466	6.04823e-05	0.000423908	WDR72	256764
-2.28457	-2.95599	6.69589e-05	0.000461897	OR5AU1	390445
-1.93726	-2.3983	7.21331e-05	0.000492917	NPY1R	4886
-1.74727	-3.0157	7.37014e-05	0.000502945	HTR1D	3352
-2.24671	-2.48274	7.64856e-05	0.000518926	DGKI	9162
-2.74454	1.08293	7.92454e-05	0.000535827	RYR2	6262
-2.56124	-3.16243	8.67269e-05	0.000578954	RBMY1J	378951
-1.80117	-1.27945	8.89831e-05	0.000592033	LRP1B	53353
-2.96791	-2.7214	9.04315e-05	0.000600468	IGFL2	147920
-2.03999	0.645723	9.22478e-05	0.000610292	RELN	5649
-1.56202	-1.44953	9.30472e-05	0.000615173	PCSK1N	27344
-2.20839	-3.03104	0.000100463	0.000654648	C12orf77	196415
-2.61625	0.416097	0.000109001	0.00070499	KCNK1	3775
-2.32236	-2.73733	0.00011071	0.000715112	LHCGR	3973
-1.69279	-0.605569	0.000122559	0.00078003	TUBAL3	79861
-1.61678	-1.02498	0.000133479	0.000837237	PNLDC1	154197
-2.72553	-0.817849	0.00013368	0.000838235	BIRC7	79444
-1.90518	-1.65388	0.000134732	0.000842976	TLE6	79816
-2.18209	-2.18405	0.000136099	0.000848862	CACNA2D1	781
-2.28775	-2.13393	0.000141252	0.000876275	SNAP91	9892
-1.65031	-1.73292	0.000141285	0.000876275	CDH10	1008
-2.01393	-2.89214	0.000142423	0.00088169	NTM	50863
-1.8463	4.6019	0.000142833	0.000883949	GPR126	57211
-2.64197	-2.64785	0.000149923	0.000920969	KCND2	3751
-1.71194	4.0242	0.000163413	0.00099404	HOXB6	3216
-1.83568	-3.28044	0.000175605	0.00105947	S100A7	6278
-1.80886	-3.07373	0.000175701	0.00105974	HCN4	10021
-3.09561	1.05099	0.000184295	0.00110322	CT45A3	441519
-1.58543	-3.2306	0.000186879	0.00111735	KLF14	136259
-1.65744	-2.88544	0.000190372	0.00113517	ARGFX	503582
-1.78614	-2.11309	0.000194127	0.00115411	C15orf54	400360
-2.26209	-3.14187	0.000197055	0.00116769	KRT4	3851
-2.85528	0.390813	0.000205826	0.00121317	ROBO2	6092
-2.28878	-1.57881	0.000208036	0.00122403	GABRB3	2562
-1.91445	-2.71866	0.000211088	0.0012387	C3orf55	152078
-1.58797	0.867606	0.000211371	0.00123999	CXCL9	4283
-1.54968	-1.42248	0.000227224	0.00131749	FGF14	2259
-1.61363	-0.974939	0.00024015	0.0013788	TSPAN12	23554
-1.59615	-0.753543	0.00024101	0.00138335	PLA2G2F	64600
-1.50944	-0.505061	0.000269623	0.00152173	SEMA3D	223117
-1.92626	-2.23726	0.000283442	0.00158715	CD207	50489
-1.59091	-2.15215	0.000316059	0.00173902	CCL24	6369
-1.54442	-2.47536	0.000364775	0.00196002	PGC	5225
-2.30125	-0.811481	0.000373212	0.00199452	DKK1	22943
-1.9934	-3.12573	0.000387851	0.00205896	RP1	6101
-2.20374	-3.16142	0.000401497	0.0021163	CFHR1	3078
-1.7068	-0.449581	0.000431441	0.00224268	RND3	390
-2.31106	-2.60886	0.000466395	0.00239324	OPCML	4978
-2.25741	3.5777	0.000479008	0.00244564	HOXB9	3219
-1.61507	-3.27496	0.000570797	0.00284187	KCNC2	3747
-1.67583	-3.29588	0.000588713	0.00291358	MAGEA6	4105
-1.93221	-2.63858	0.00059642	0.00294622	GABRG1	2565
-1.76263	-0.152971	0.000610164	0.00300263	MT1G	4495
-2.39954	-3.08218	0.000611585	0.0030074	MGC26647	219557
-1.69317	-3.04868	0.000621283	0.00304458	TUBB2B	347733
-1.50923	-3.31632	0.000627578	0.00307165	PSG6	5675
-2.0117	-3.22476	0.000629311	0.00307755	OR10X1	128367
-1.75335	-1.10671	0.000641692	0.00312768	FAM71A	149647
-1.58981	-1.85405	0.000650718	0.0031624	GJA5	2702
-1.53936	0.848939	0.000662025	0.00320485	MEIS2	4212
-2.71662	2.33898	0.000683464	0.00328471	CT45A1	541466
-2.2437	-3.17507	0.000719577	0.00343262	?	553137
-1.63799	-0.865026	0.000723323	0.00344708	GPC3	2719
-2.52728	-2.80825	0.000753132	0.00357048	CLCA1	1179
-2.0796	1.39583	0.000754328	0.0035753	TEX15	56154
-2.55096	-3.03851	0.000764591	0.00361793	PIWIL1	9271
-1.68351	-3.16063	0.00078082	0.0036835	CCKBR	887
-2.15157	-2.35441	0.000850878	0.00396785	PTPN5	84867
-1.51351	-3.31219	0.000916391	0.00423472	FABP6	2172
-1.61767	-3.27247	0.000935411	0.00430774	SMPX	23676
-1.79815	-0.268544	0.001023	0.0046392	NKAIN1	79570
-1.99571	-0.523771	0.00103198	0.00467144	IL22RA2	116379
-2.1861	-3.05129	0.00105382	0.00474983	KCNV1	27012
-1.87113	-3.19772	0.00105897	0.00476762	SDR16C5	195814
-2.5774	-2.07373	0.00107394	0.00482087	NKAIN4	128414
-2.02759	-3.08679	0.00120265	0.00529497	REG1B	5968
-1.64039	-2.0442	0.00127209	0.00555286	PABPC5	140886
-1.72637	-3.0637	0.00127272	0.00555441	RHBG	57127
-2.07924	-3.16845	0.0012835	0.0055892	DMRT3	58524
-1.72926	-2.5525	0.00128496	0.00559435	EMILIN3	90187
-1.75274	2.09739	0.00132235	0.00572835	GLI2	2736
-2.62296	1.05592	0.00142714	0.00611456	CT45A5	441521
-1.74642	-3.19287	0.00146673	0.00625608	BDKRB1	623
-1.59676	-2.82059	0.0015188	0.00643126	SERPINA5	5104
-1.97567	-0.413784	0.0015507	0.00653946	PENK	5179
-1.79956	-3.29003	0.00172031	0.00715093	PRNT	149830
-1.61599	-3.22992	0.00181159	0.00745854	AKAP4	8852
-1.73618	-2.61202	0.00184017	0.00754687	TRPM8	79054
-2.55408	-2.38373	0.001877	0.00767741	STATH	6779
-1.89122	-2.86593	0.00188469	0.00770413	RNF17	56163
-2.49917	-2.35963	0.00190798	0.00778495	ZNF804B	219578
-1.92369	-3.09644	0.00197167	0.00799901	AQP2	359
-2.02889	-2.85021	0.00228828	0.00903352	FAM43B	163933
-1.6713	-2.52913	0.0023302	0.00916817	GCKR	2646
-1.69869	-3.13338	0.00241727	0.00946405	STMN2	11075
-1.5062	-3.29538	0.00248885	0.0097005	OR7E5P	219445
-1.79595	-2.71274	0.0025198	0.00980768	GDF2	2658
-1.95673	2.34683	0.00261554	0.010127	HOXB8	3218
-1.66259	-3.26533	0.00276956	0.0106009	LHX9	56956
-1.53553	-0.771442	0.00295901	0.0112071	RSPO2	340419
-1.83206	0.948799	0.00316508	0.0118738	WNT7B	7477
-1.62573	-3.04532	0.00318336	0.0119294	MMP1	4312
-1.51236	-3.18756	0.00321244	0.0120157	NCRNA00099	359822
-1.66809	-3.19421	0.00334734	0.0124364	STK32A	202374
-1.864	0.366475	0.00344619	0.0127443	NMU	10874
-1.55924	-3.23007	0.00363863	0.0133445	SPERT	220082
-1.62301	1.63838	0.0037514	0.0136826	ANXA8L2	244
-1.98405	-3.11694	0.00396857	0.0143487	KLK7	5650
-1.66952	-3.09109	0.00411784	0.0147972	RXFP3	51289
-1.86073	-3.17599	0.0044503	0.0157548	MUM1L1	139221
-1.60567	-1.55447	0.00451415	0.015937	MRAP2	112609
-1.9642	-2.78941	0.00470621	0.0164779	FSTL5	56884
-1.78347	-2.77886	0.00528634	0.0181553	MGC2889	84789
-1.54786	-0.128002	0.00605184	0.0202779	HS3ST4	9951
-1.53866	-3.23369	0.00637533	0.021124	UGT2B7	7364
-1.8533	-1.46311	0.00663311	0.0218042	PCDH20	64881
-1.55203	2.23139	0.00678627	0.0222271	VAT1L	57687
-1.50381	-3.08313	0.0069248	0.0225954	GRIK2	2898
-1.56395	-3.06187	0.00725998	0.0235159	IL1RAPL1	11141
-1.52255	-2.79401	0.00781295	0.024946	ARSI	340075
-1.54103	-3.12935	0.00792273	0.0252444	KRT77	374454
-1.61549	-3.17756	0.00807217	0.0256386	SPANXN3	139067
-1.98735	0.883843	0.00895585	0.0279249	NCR2	9436
-1.61669	0.00315551	0.0102542	0.03125	SPESP1	246777
-1.54447	-2.8037	0.0105947	0.0321257	DVWA	344875
-1.77642	1.87735	0.0136538	0.039578	FIGN	55137

## Sheet: Possitively correlated miRNAs
logFC	logCPM	PValue	FDR	gene
1.67639	8.88037	7.25111e-14	4.05337e-11	hsa-mir-335
1.15122	11.7221	2.17406e-11	3.03825e-09	hsa-mir-146a
1.33397	8.58936	3.94826e-11	4.41415e-09	hsa-mir-130a
2.3437	3.15726	1.2017e-07	4.19845e-06	hsa-mir-935
1.80685	7.08794	1.29017e-07	4.24237e-06	hsa-mir-203
0.732537	8.25903	2.73756e-07	8.50163e-06	hsa-mir-128-1
0.735274	7.4408	1.82932e-06	4.84786e-05	hsa-mir-128-2
1.07019	14.2148	4.47012e-06	0.000108643	hsa-mir-126
1.33152	9.34931	8.47054e-06	0.000197293	hsa-mir-125b-1
1.13746	3.15482	9.4521e-06	0.000211349	hsa-mir-1266
2.13712	3.21478	1.23586e-05	0.00026571	hsa-mir-196a-2
0.752487	8.69522	1.93431e-05	0.000372854	hsa-mir-181c
0.787624	6.14525	2.25307e-05	0.000406279	hsa-mir-181d
1.16934	6.24286	0.000115379	0.00174316	hsa-mir-153-2
0.686899	6.0113	0.00012158	0.0017885	hsa-mir-181b-2
0.899719	9.89689	0.00021085	0.00302219	hsa-let-7c
0.363074	12.2228	0.000227558	0.00318013	hsa-mir-30c-2
0.904798	7.99561	0.000403473	0.00493909	hsa-mir-99a
0.470657	7.07733	0.000459127	0.00546068	hsa-mir-766
0.414731	11.786	0.000520622	0.00593934	hsa-mir-92a-1
0.918043	3.50621	0.00054017	0.0060391	hsa-mir-125b-2
0.650718	14.9197	0.0006455	0.00693912	hsa-mir-181a-1
0.560936	11.3963	0.00068425	0.00716225	hsa-mir-181a-2
0.358747	6.04073	0.000691881	0.00716225	hsa-let-7f-1
0.633965	4.43795	0.000760111	0.00772549	hsa-mir-1271
1.07565	2.86095	0.000886838	0.00885255	hsa-mir-190b
1.44601	2.17068	0.00108893	0.010495	hsa-mir-129-1
0.549889	12.7184	0.00111095	0.0105258	hsa-mir-146b
0.962861	3.66909	0.00133957	0.0122757	hsa-mir-195
0.361008	11.8675	0.0015504	0.0139786	hsa-mir-30b
0.576222	11.9571	0.00191566	0.0164746	hsa-mir-181b-1
0.392452	12.8236	0.00221147	0.018384	hsa-mir-1975
0.358141	10.6474	0.00242367	0.0196353	hsa-mir-222
0.399016	4.75121	0.00246242	0.0196642	hsa-mir-1287
0.523303	7.84473	0.00349721	0.0260658	hsa-mir-1201
0.320993	11.3317	0.00395027	0.0286247	hsa-mir-221
0.294209	14.3925	0.00442786	0.0311642	hsa-mir-30d
0.521621	5.34501	0.00447246	0.0311642	hsa-mir-551a
0.882536	3.80037	0.00668799	0.043472	hsa-mir-497
0.606443	8.77969	0.00682641	0.0438616	hsa-mir-125a

## Sheet: Negatively correlated miRNAs
logFC	logCPM	PValue	FDR	gene
-1.1427	4.55423	3.98918e-12	7.48339e-10	hsa-mir-362
-1.28218	6.53311	4.01613e-12	7.48339e-10	hsa-mir-152
-7.01784	5.33864	1.48041e-10	1.37925e-08	hsa-mir-1269
-0.948004	10.1317	3.67034e-10	2.93103e-08	hsa-mir-532
-0.774898	14.7444	9.14079e-10	6.38713e-08	hsa-mir-22
-0.962524	4.3854	3.21796e-09	1.99871e-07	hsa-mir-502
-1.38238	10.7281	8.88908e-09	4.969e-07	hsa-mir-582
-1.17261	6.26101	1.16339e-08	5.91215e-07	hsa-mir-886
-0.847082	17.0222	2.20894e-08	1.029e-06	hsa-mir-21
-1.18909	3.25316	6.5841e-08	2.83116e-06	hsa-mir-188
-0.994222	6.32555	1.04836e-07	4.18597e-06	hsa-mir-501
-0.749799	7.31871	1.15883e-07	4.19845e-06	hsa-mir-339
-0.833418	9.18838	9.58402e-07	2.81972e-05	hsa-mir-500
-0.750113	6.0558	1.2596e-06	3.52059e-05	hsa-mir-660
-0.664014	4.76707	1.90792e-06	4.84786e-05	hsa-mir-1976
-1.91855	3.9869	1.35769e-05	0.000281093	hsa-mir-508
-1.49821	2.62045	1.46363e-05	0.000292204	hsa-mir-885
-1.2143	1.99178	2.05288e-05	0.000382521	hsa-mir-1910
-0.422752	11.7023	2.43203e-05	0.000424845	hsa-mir-24-2
-0.702678	14.6814	4.10031e-05	0.000694568	hsa-let-7b
-0.63054	4.71055	5.08819e-05	0.000836558	hsa-mir-1249
-0.266312	11.1257	8.07115e-05	0.00128908	hsa-mir-140
-0.361178	7.71152	9.05847e-05	0.00140658	hsa-mir-589
-1.83684	1.54432	0.000368801	0.00493909	hsa-mir-506
-1.31759	10.2588	0.000381563	0.00493909	hsa-mir-9-2
-1.31385	10.2552	0.00038834	0.00493909	hsa-mir-9-1
-0.681102	8.5835	0.000395976	0.00493909	hsa-mir-210
-0.455255	12.0434	0.000406436	0.00493909	hsa-mir-27a
-0.371228	13.1014	0.000489215	0.00569732	hsa-mir-23a
-1.16619	3.05027	0.000562748	0.00616816	hsa-mir-511-2
-0.917165	5.28874	0.00104134	0.0102124	hsa-mir-1274b
-0.865425	5.27853	0.00123425	0.0114991	hsa-mir-708
-1.77576	1.95451	0.00168277	0.0149313	hsa-mir-514-2
-1.09386	16.8289	0.00171271	0.0149595	hsa-mir-10a
-0.5566	14.8042	0.00208571	0.0176654	hsa-mir-148a
-1.55019	2.06782	0.00223634	0.018384	hsa-mir-514-3
-0.773655	1.75687	0.00259656	0.0203526	hsa-mir-1538
-0.55219	4.74378	0.00262145	0.0203526	hsa-mir-326
-0.357197	15.0355	0.0027322	0.0209219	hsa-mir-223
-1.55423	2.06641	0.00343843	0.0259741	hsa-mir-9-3
-1.01677	3.04237	0.00370347	0.02724	hsa-mir-511-1
-0.951503	1.81779	0.00399414	0.0286247	hsa-mir-429
-0.287863	7.01359	0.00451574	0.0311642	hsa-mir-652
-0.520697	6.24072	0.00463438	0.0314008	hsa-mir-33a
-0.519904	3.28974	0.00466237	0.0314008	hsa-mir-1537
-0.940997	1.59315	0.00489568	0.0325796	hsa-mir-1250
-1.4098	2.02281	0.00576089	0.0378863	hsa-mir-514-1
-0.27879	9.13495	0.00781488	0.0496422	hsa-mir-29b-2
