# Supplementary material for: Expression and prognosis analysis of DNMT family in acute myeloid leukemia
Source: Aging (Albany NY). 2020 Jun 26;12(14):14677–90. doi: 10.18632/aging.103520 (PMC7425446; doi:10.18632/aging.103520)
Supplement: Supplementary Table 2 [file aging-12-103520-s001..xlsx]

## Sheet: venn_result29820
Supplementary Table 2. Venn results of microRNAs targeting DNMT3A.
Names	total	elements
TargetScan miRDB mirDIP starBase	16	hsa-miR-30d-5p
		hsa-miR-429
		hsa-miR-30b-5p
		hsa-miR-129-5p
		hsa-miR-5688
		hsa-miR-199a-3p
		hsa-miR-30c-5p
		hsa-miR-29c-3p
		hsa-miR-144-3p
		hsa-miR-30a-5p
		hsa-miR-30e-5p
		hsa-miR-29b-3p
		hsa-miR-199b-3p
		hsa-miR-6835-3p
		hsa-miR-495-3p
		hsa-miR-29a-3p
TargetScan mirDIP starBase	4	hsa-miR-212-3p
		hsa-miR-194-5p
		hsa-miR-137
		hsa-miR-132-3p
miRDB mirDIP starBase	3	hsa-miR-101-3p
		hsa-miR-182-5p
		hsa-miR-96-5p
TargetScan miRDB starBase	9	hsa-miR-143-3p
		hsa-miR-3129-5p
		hsa-miR-493-5p
		hsa-miR-6088
		hsa-miR-7-5p
		hsa-miR-200c-3p
		hsa-miR-200b-3p
		hsa-miR-4770
		hsa-miR-410-3p
mirDIP starBase	14	hsa-miR-513a-5p
		hsa-miR-3173-5p
		hsa-miR-628-5p
		hsa-miR-3909
		hsa-miR-1271-5p
		hsa-miR-874-3p
		hsa-miR-148a-3p
		hsa-miR-942-5p
		hsa-miR-296-3p
		hsa-miR-147a
		hsa-miR-27b-3p
		hsa-miR-148b-3p
		hsa-miR-27a-3p
		hsa-miR-152-3p
TargetScan starBase	32	hsa-miR-361-5p
		hsa-miR-487a-3p
		hsa-miR-3139
		hsa-miR-92b-3p
		hsa-miR-374b-5p
		hsa-miR-1306-5p
		hsa-miR-154-3p
		hsa-miR-374a-5p
		hsa-miR-4465
		hsa-miR-363-3p
		hsa-miR-28-5p
		hsa-miR-330-3p
		hsa-miR-323a-3p
		hsa-miR-215-5p
		hsa-miR-1-3p
		hsa-miR-32-5p
		hsa-miR-708-5p
		hsa-miR-26a-5p
		hsa-miR-218-5p
		hsa-miR-192-5p
		hsa-miR-92a-3p
		hsa-miR-206
		hsa-miR-136-5p
		hsa-miR-340-5p
		hsa-miR-25-3p
		hsa-miR-367-3p
		hsa-miR-338-3p
		hsa-miR-26b-5p
		hsa-miR-532-5p
		hsa-miR-22-3p
		hsa-miR-1297
		hsa-miR-613
miRDB starBase	1	hsa-miR-589-5p
miRDB mirDIP	53	hsa-miR-6833-3p
		hsa-miR-4740-5p
		hsa-miR-4782-5p
		hsa-miR-2276-3p
		hsa-miR-378j
		hsa-miR-6839-5p
		hsa-let-7a-2-3p
		hsa-miR-7110-3p
		hsa-miR-190a-3p
		hsa-miR-4536-5p
		hsa-miR-6881-3p
		hsa-miR-6775-3p
		hsa-miR-3613-3p
		hsa-miR-6771-3p
		hsa-miR-6867-3p
		hsa-miR-567
		hsa-miR-6780a-3p
		hsa-miR-6508-5p
		hsa-miR-2052
		hsa-miR-4704-3p
		hsa-miR-4307
		hsa-miR-8068
		hsa-miR-3202
		hsa-miR-3149
		hsa-let-7g-3p
		hsa-miR-7111-3p
		hsa-miR-5706
		hsa-miR-219b-5p
		hsa-miR-2276-5p
		hsa-miR-1207-5p
		hsa-miR-3151-3p
		hsa-miR-6776-5p
		hsa-miR-7150
		hsa-miR-5011-5p
		hsa-miR-8067
		hsa-miR-4763-3p
		hsa-miR-6888-5p
		hsa-miR-5010-3p
		hsa-miR-1260a
		hsa-miR-6873-3p
		hsa-miR-4738-3p
		hsa-miR-767-5p
		hsa-miR-548g-3p
		hsa-miR-4423-3p
		hsa-miR-514a-5p
		hsa-miR-6885-3p
		hsa-miR-1183
		hsa-miR-548as-3p
		hsa-miR-4768-3p
		hsa-miR-6809-3p
		hsa-miR-4759
		hsa-miR-3169
		hsa-miR-4687-5p
starBase	65	hsa-miR-518d-5p
		hsa-miR-149-5p
		hsa-miR-498
		hsa-miR-515-5p
		hsa-miR-1323
		hsa-let-7i-5p
		hsa-miR-548o-3p
		hsa-miR-654-3p
		hsa-miR-1276
		hsa-miR-450a-5p
		hsa-miR-516b-5p
		hsa-miR-545-3p
		hsa-miR-146a-5p
		hsa-miR-532-3p
		hsa-miR-520c-5p
		hsa-miR-4766-5p
		hsa-miR-580-3p
		hsa-miR-490-3p
		hsa-miR-205-5p
		hsa-miR-627-5p
		hsa-miR-146b-5p
		hsa-miR-494-3p
		hsa-miR-150-5p
		hsa-let-7e-5p
		hsa-miR-526a
		hsa-miR-885-5p
		hsa-miR-4458
		hsa-miR-1321
		hsa-miR-370-3p
		hsa-miR-4500
		hsa-let-7b-5p
		hsa-miR-488-3p
		hsa-let-7f-5p
		hsa-miR-335-5p
		hsa-let-7d-5p
		hsa-miR-4739
		hsa-miR-582-5p
		hsa-miR-524-5p
		hsa-miR-543
		hsa-let-7a-5p
		hsa-miR-431-5p
		hsa-miR-337-3p
		hsa-let-7c-5p
		hsa-miR-331-3p
		hsa-miR-520a-5p
		hsa-miR-523-3p
		hsa-miR-129-2-3p
		hsa-miR-204-5p
		hsa-miR-455-3p
		hsa-miR-519b-5p
		hsa-miR-506-3p
		hsa-miR-211-5p
		hsa-miR-98-5p
		hsa-miR-574-5p
		hsa-miR-362-5p
		hsa-let-7g-5p
		hsa-miR-519c-5p
		hsa-miR-124-3p
		hsa-miR-296-5p
		hsa-miR-599
		hsa-miR-520d-5p
		hsa-miR-411-5p
		hsa-miR-383-5p
		hsa-miR-3179
		hsa-miR-671-5p
mirDIP	74	hsa-miR-6769b-5p
		hsa-miR-4515
		hsa-miR-4539
		hsa-miR-6514-5p
		hsa-miR-3681-5p
		hsa-miR-4802-5p
		hsa-miR-6817-3p
		hsa-miR-6741-5p
		hsa-miR-6787-5p
		hsa-miR-202-3p
		hsa-miR-1184
		hsa-miR-3681-3p
		hsa-miR-7154-5p
		hsa-miR-9-5p
		hsa-miR-3943
		hsa-miR-6773-3p
		hsa-miR-216a-3p
		hsa-miR-6735-3p
		hsa-miR-8060
		hsa-miR-6790-3p
		hsa-miR-6847-3p
		hsa-miR-3182
		hsa-miR-4747-5p
		hsa-miR-3607-3p
		hsa-miR-6860
		hsa-miR-1206
		hsa-miR-139-3p
		hsa-miR-4659a-5p
		hsa-miR-4781-3p
		hsa-miR-3911
		hsa-miR-7976
		hsa-miR-4459
		hsa-miR-6853-3p
		hsa-miR-8075
		hsa-miR-5196-5p
		hsa-miR-3663-5p
		hsa-miR-766-3p
		hsa-miR-4660
		hsa-miR-128-3p
		hsa-miR-6852-3p
		hsa-miR-146b-3p
		hsa-miR-4672
		hsa-miR-4753-3p
		hsa-miR-4705
		hsa-miR-7846-3p
		hsa-miR-668-3p
		hsa-miR-6079
		hsa-miR-4279
		hsa-miR-6769a-5p
		hsa-miR-653-3p
		hsa-miR-6131
		hsa-miR-6799-3p
		hsa-miR-6815-5p
		hsa-miR-6870-3p
		hsa-miR-6865-5p
		hsa-miR-378g
		hsa-miR-320e
		hsa-miR-3941
		hsa-miR-4530
		hsa-miR-6736-3p
		hsa-miR-581
		hsa-miR-5001-3p
		hsa-miR-4313
		hsa-miR-676-5p
		hsa-miR-382-3p
		hsa-miR-877-3p
		hsa-miR-205-3p
		hsa-miR-4290
		hsa-miR-6128
		hsa-miR-6817-5p
		hsa-miR-3944-5p
		hsa-miR-1208
		hsa-miR-4653-3p
		hsa-miR-6075
TargetScan	19	hsa-miR-665
		hsa-miR-23c
		hsa-miR-23b-3p
		hsa-miR-489-3p
		hsa-miR-23a-3p
		hsa-miR-362-3p
		hsa-miR-455-3p.1
		hsa-miR-138-5p
		hsa-miR-877-5p
		hsa-miR-19a-3p
		hsa-miR-329-3p
		hsa-miR-19b-3p
		hsa-miR-130a-5p
		hsa-miR-5195-3p
		hsa-miR-101-3p.1
		hsa-miR-203a-3p.1
		hsa-miR-101-3p.2
		hsa-miR-504-5p.1
		hsa-miR-145-5p
miRDB	102	hsa-miR-1260b
		hsa-miR-3622b-3p
		hsa-miR-3170
		hsa-miR-3622a-5p
		hsa-miR-3200-5p
		hsa-miR-4768-5p
		hsa-miR-4772-5p
		hsa-miR-9983-3p
		hsa-miR-3622a-3p
		hsa-miR-6779-3p
		hsa-miR-6801-3p
		hsa-miR-3059-5p
		hsa-miR-6076
		hsa-miR-6855-5p
		hsa-miR-146a-3p
		hsa-miR-675-3p
		hsa-miR-548av-3p
		hsa-miR-3121-3p
		hsa-miR-3907
		hsa-miR-19b-1-5p
		hsa-miR-6742-5p
		hsa-miR-548bb-3p
		hsa-miR-6782-3p
		hsa-miR-7106-5p
		hsa-miR-137-3p
		hsa-miR-1306-3p
		hsa-miR-548aw
		hsa-miR-7853-5p
		hsa-miR-1277-5p
		hsa-miR-1468-3p
		hsa-miR-19b-2-5p
		hsa-miR-208a-5p
		hsa-miR-4708-3p
		hsa-miR-6825-5p
		hsa-miR-6797-3p
		hsa-miR-4448
		hsa-miR-3117-3p
		hsa-miR-4476
		hsa-let-7c-3p
		hsa-miR-6872-3p
		hsa-miR-7114-5p
		hsa-miR-6787-3p
		hsa-miR-4287
		hsa-miR-5580-5p
		hsa-miR-4505
		hsa-miR-92a-2-5p
		hsa-miR-105-5p
		hsa-miR-4694-5p
		hsa-miR-5787
		hsa-miR-508-5p
		hsa-miR-3192-3p
		hsa-miR-4311
		hsa-miR-6804-3p
		hsa-miR-1299
		hsa-miR-3135b
		hsa-miR-10398-5p
		hsa-miR-6731-5p
		hsa-miR-4268
		hsa-miR-6845-3p
		hsa-miR-5704
		hsa-miR-12122
		hsa-miR-297
		hsa-miR-5581-3p
		hsa-miR-6806-5p
		hsa-miR-208b-5p
		hsa-miR-548z
		hsa-miR-4685-3p
		hsa-miR-4772-3p
		hsa-miR-498-3p
		hsa-miR-6772-3p
		hsa-miR-29a-5p
		hsa-miR-4533
		hsa-miR-548d-3p
		hsa-miR-8083
		hsa-miR-6810-3p
		hsa-miR-518c-5p
		hsa-miR-203a-5p
		hsa-miR-605-3p
		hsa-miR-4433a-3p
		hsa-miR-1244
		hsa-miR-570-3p
		hsa-miR-548h-3p
		hsa-miR-3065-5p
		hsa-miR-4492
		hsa-miR-548ac
		hsa-miR-7152-5p
		hsa-miR-6083
		hsa-miR-10395-3p
		hsa-miR-670-3p
		hsa-miR-8085
		hsa-miR-5693
		hsa-miR-3529-3p
		hsa-miR-188-3p
		hsa-miR-2355-5p
		hsa-miR-2117
		hsa-miR-3692-5p
		hsa-miR-5582-5p
		hsa-miR-19a-5p
		hsa-miR-1291
		hsa-miR-134-3p
		hsa-miR-10522-5p
		hsa-miR-1285-5p
